# Supplementary material for: Mechanistic insights into trisulfur radical generation in lithium–sulfur batteries
Source: Royal Society of Chemistry journal article supplement (doi:10.1039/d3ta03366j), 2023-01-01
Supplement: d3ta03366j1.pdf [file d3ta03366j1.pdf]

## Supporting Information

### Mechanistic insights into trisulfur radical generation in lithium–sulfur batteries

Xu Han,<sup>1</sup> Xuefei Xu<sup>1,\*</sup>

<sup>1</sup>Center for Combustion Energy, Department of Energy and Power Engineering, and  
Key Laboratory for Thermal Science and Power Engineering of Ministry of  
Education, Tsinghua University, Beijing 100084, China

\*Email: xuxuefei@tsinghua.edu.cn (X. Xu)

#### Contents

|     |                                                                                                                                                                        |     |
|-----|------------------------------------------------------------------------------------------------------------------------------------------------------------------------|-----|
| 1.  | Table S1. Reaction energies and forward reaction barriers of $S_6^{2-} \rightarrow S_3^{\cdot-} + S_3^{\cdot-}$ in gas phase calculated by various model chemistries.  | S3  |
| 2.  | Table S2. Comparison of reaction energies and forward reaction barriers of some S–S bond cleavage reactions in solution calculated by two different model chemistries. | S4  |
| 3.  | Table S3. Comparison of binding energies calculated by two different model chemistries.                                                                                | S5  |
| 4.  | Table S4. Interaction energies between two fragments and basis set superposition error.                                                                                | S5  |
| 5.  | Table S5. Calculation setups for the SMD solvation models.                                                                                                             | S6  |
| 6.  | Table S6. Energy components of interactions between two fragments.                                                                                                     | S20 |
| 7.  | Table S7. Bond dissociation energies of Li–S and S–S bond.                                                                                                             | S22 |
| 8.  | Table S8. Reaction free energies of R1.                                                                                                                                | S23 |
| 9.  | Table S9. Reaction free energies of R2.                                                                                                                                | S24 |
| 10. | Table S10. Reaction free energies of R3.                                                                                                                               | S26 |
| 11. | Table S11. Reaction free energies of R4.                                                                                                                               | S27 |
| 12. | Table S12. Reaction free energies of R5.                                                                                                                               | S28 |
| 13. | Table S13. Reaction free energies of R6.                                                                                                                               | S29 |
| 14. | Table S14. Reaction free energies of R7.                                                                                                                               | S31 |
| 15. | Table S15. Reaction free energies of R8.                                                                                                                               | S32 |
| 16. | Table S16. Imaginary frequencies of all transition states.                                                                                                             | S33 |
| 17. | Table S17. Binding free energies of species in DMSO, DMA, and DOL.                                                                                                     | S44 |
| 18. | Table S18. Lowest reaction free energies of R1–R3 in DMSO, DMA, and DOL.                                                                                               | S45 |
| 19. | Table S19. Lowest reaction free energies of R4–R9 in DMSO, DMA, and DOL.                                                                                               | S46 |
| 20. | Table S20. Binding free energies of tetrasulfur and disulfur radicals in DMSO and DOL.                                                                                 | S54 |
| 21. | Table S21. Lowest reaction free energies of R10–R17 in DMSO and DOL.                                                                                                   | S55 |
| 22. | Fig. S1. Optimized solvation structures of $Li_2S_6$ in DMSO.                                                                                                          | S7  |
| 23. | Fig. S2. Optimized solvation structures of $Li_2S_6$ in DOL.                                                                                                           | S8  |
| 24. | Fig. S3. Optimized solvation structures of $LiS_6^-$ in DMSO.                                                                                                          | S9  |
| 25. | Fig. S4. Optimized solvation structures of $LiS_6^-$ in DOL.                                                                                                           | S10 |
| 26. | Fig. S5. Optimized solvation structures of $LiS_3^{\cdot}$ in DMSO.                                                                                                    | S11 |
| 27. | Fig. S6. Optimized solvation structures of $LiS_3^{\cdot}$ in DOL.                                                                                                     | S12 |
| 28. | Fig. S7. Optimized solvation structures of $Li^+$ in DMSO.                                                                                                             | S13 |
| 29. | Fig. S8. Optimized solvation structures of $Li^+$ in DOL.                                                                                                              | S14 |
| 30. | Fig. S9. Optimized solvation structures of $S_6^{2-}$ and $S_3^{\cdot-}$ in DMSO.                                                                                      | S15 |
| 31. | Fig. S10. Optimized solvation structures of $S_6^{2-}$ and $S_3^{\cdot-}$ in DOL.                                                                                      | S16 |

|     |                                                                                                                                                                                                                 |     |
|-----|-----------------------------------------------------------------------------------------------------------------------------------------------------------------------------------------------------------------|-----|
| 32. | Fig. S11. Optimized solvation structures of $\text{Li}_2\text{S}_6$ , $\text{LiS}_6^-$ , $\text{LiS}_3^*$ , and $\text{Li}^+$ with the best NCS in DOL.                                                         | S17 |
| 33. | Fig. S12. Optimized intermediate or transition state solvation structures in the reaction of $\text{Li}_2\text{S}_6(\text{DMSO})_4 + 4\text{DMSO} \rightarrow 2\text{S}_3^{*-} + 2\text{Li}^+(\text{DMSO})_4$ . | S18 |
| 34. | Fig. S13. Optimized intermediate or transition state solvation structures in the reaction of $\text{Li}_2\text{S}_6(\text{DOL})_4 \rightarrow 2\text{LiS}_3^*(\text{DOL})_2$ .                                  | S19 |
| 35. | Fig. S14. Charge distribution and average Li–S bond lengths of $\text{Li}_2\text{S}_6$ and $\text{LiS}_6^-$ .                                                                                                   | S21 |
| 36. | Fig. S15. Spin-crossing analysis from $^1\text{S}_6^{2-*}$ to $^3(\text{S}_3^{*-}-\text{S}_3^{*-})$ in DMSO.                                                                                                    | S34 |
| 37. | Fig. S16. Proposed generation mechanism of trisulfur radicals in DOL for the reaction of $\text{Li}_2\text{S}_6(\text{DOL})_4 \rightarrow 2\text{LiS}_3^*(\text{DOL})_2$ .                                      | S35 |
| 38. | Fig. S17. Optimized solvation structures of $\text{Li}_2\text{S}_6$ in DMA.                                                                                                                                     | S37 |
| 39. | Fig. S18. Optimized solvation structures of $\text{LiS}_6^-$ in DMA.                                                                                                                                            | S38 |
| 40. | Fig. S19. Optimized solvation structures of $\text{LiS}_3^*$ in DMA.                                                                                                                                            | S39 |
| 41. | Fig. S20. Optimized solvation structures of $\text{Li}^+$ in DMA.                                                                                                                                               | S40 |
| 42. | Fig. S21. Optimized solvation structures of $\text{S}_6^{2-}$ and $\text{S}_3^{*-}$ in DMA.                                                                                                                     | S41 |
| 43. | Fig. S22. Proposed generation mechanism of trisulfur radicals in DMA for the reaction of $\text{S}_6^{2-} \rightarrow 2\text{S}_3^{*-}$ .                                                                       | S42 |
| 44. | Fig. S23. Optimized solvation structures of $\text{LiS}_4^*$ in DMSO.                                                                                                                                           | S47 |
| 45. | Fig. S24. Optimized solvation structures of $\text{LiS}_4^*$ in DOL.                                                                                                                                            | S48 |
| 46. | Fig. S25. Optimized solvation structures of $\text{LiS}_2^*$ in DMSO.                                                                                                                                           | S49 |
| 47. | Fig. S26. Optimized solvation structures of $\text{LiS}_2^*$ in DOL.                                                                                                                                            | S50 |
| 48. | Fig. S27. Optimized solvation structures of $\text{S}_4^{*-}$ and $\text{S}_2^{*-}$ in DMSO.                                                                                                                    | S51 |
| 49. | Fig. S28. Optimized solvation structures of $\text{S}_4^{*-}$ and $\text{S}_2^{*-}$ in DOL.                                                                                                                     | S52 |

## 1. Selection and validation of model chemistries

To select appropriate model chemistries, we firstly calculate the reaction energies and forward reaction barriers of the reaction  $S_6^{2-} \rightarrow S_3^{\bullet-} + S_3^{\bullet-}$  in gas phase using different model chemistries. The results in Table S1 suggest that MN15/6-311+G(3d2f) and revM06/6-311+G(3d2f) have smaller deviations relative to the benchmark. Because revM06 gives a more precise energy barrier than MN15, and revM06 is thought to perform better in describing intermolecular weak interactions than MN15 based on the tests by Wang *et al.*,<sup>1</sup> we conclude that revM06 is the most suitable functional for our system.

However, given that geometric optimizations using revM06/6-311+G(3d2f) is expensive when too many explicit solvent molecules are considered, we make the following comparisons in Table S2 and Table S3 using two different combinations of model chemistries, namely revM06/BASE<sup>L</sup>//revM06/BASE<sup>S</sup> (denoted as Model1) and revM06/BASE<sup>L</sup> (denoted as Model2). The maximum unsigned deviation of reaction energies, forward reaction barriers, and binding energies using Model1 relative to corresponding values by Model2 are only 0.05, 0.05, and 0.07 kcal/mol, respectively. It suggests our calculations based on Model1 are accurate enough.

Therefore, we employ revM06/BASE<sup>L</sup>//revM06/BASE<sup>S</sup> model chemistry to calculate the energetics in this work.

Table S1. Reaction energies ( $\Delta E$ , in kcal/mol) and forward reaction barriers ( $\Delta E^\ddagger$ , in kcal/mol) of the reaction  $S_6^{2-} \rightarrow S_3^{\bullet-} + S_3^{\bullet-}$  in gas phase calculated by various model chemistries and the corresponding deviations from the benchmark.

| method <sup>a</sup> | $\Delta E$ | UD( $\Delta E$ ) | $\Delta E^\ddagger$ | UD( $\Delta E^\ddagger$ ) | MUD <sup>b</sup> |
|---------------------|------------|------------------|---------------------|---------------------------|------------------|
| MN15                | -45.21     | 0.08             | 12.62               | 1.45                      | 0.77             |
| revM06              | -46.36     | 1.23             | 11.84               | 0.67                      | 0.95             |
| M06                 | -45.40     | 0.27             | 9.51                | 1.66                      | 0.97             |
| M06-2X              | -45.49     | 0.36             | 13.06               | 1.88                      | 1.12             |
| M05-2X              | -47.88     | 2.75             | 11.35               | 0.18                      | 1.47             |
| M08-HX              | -46.15     | 1.02             | 13.46               | 2.29                      | 1.65             |
| M08-SO              | -44.53     | 0.60             | 13.99               | 2.81                      | 1.71             |
| $\omega$ B97X-D     | -47.89     | 2.76             | 12.58               | 1.41                      | 2.08             |
| PWB6K               | -49.08     | 3.95             | 11.56               | 0.39                      | 2.17             |
| N12-SX              | -47.93     | 2.80             | 9.07                | 2.10                      | 2.45             |
| APFD                | -47.62     | 2.49             | 8.64                | 2.53                      | 2.51             |
| M11                 | -47.84     | 2.71             | 13.78               | 2.60                      | 2.66             |
| BMK                 | -43.03     | 2.10             | 15.07               | 3.90                      | 3.00             |
| MN12-SX             | -48.84     | 3.71             | 8.22                | 2.96                      | 3.34             |
| PW6B95-D3           | -48.94     | 3.81             | 8.15                | 3.02                      | 3.42             |
| PBE0                | -49.43     | 4.30             | 8.18                | 2.99                      | 3.65             |
| revM11              | -43.72     | 1.42             | 17.07               | 5.90                      | 3.66             |
| B97-1               | -48.57     | 3.44             | 7.20                | 3.98                      | 3.71             |

|          |        |       |       |       |       |
|----------|--------|-------|-------|-------|-------|
| B97-3    | -50.08 | 4.95  | 8.39  | 2.79  | 3.87  |
| MN15-L   | -48.05 | 2.92  | 5.98  | 5.20  | 4.06  |
| HSE06    | -49.70 | 4.57  | 7.17  | 4.00  | 4.28  |
| revM06-L | -48.62 | 3.49  | 6.10  | 5.08  | 4.29  |
| M06-HF   | -42.22 | 2.91  | 16.96 | 5.78  | 4.35  |
| PBEsol   | -45.12 | 0.01  | 2.44  | 8.74  | 4.38  |
| MN12-L   | -47.94 | 2.81  | 5.23  | 5.94  | 4.38  |
| B3LYP    | -48.91 | 3.78  | 6.11  | 5.06  | 4.42  |
| PW6B95   | -51.00 | 5.87  | 7.50  | 3.67  | 4.77  |
| GVWN3    | -38.98 | 6.15  | 3.91  | 7.27  | 6.71  |
| N12      | -50.79 | 5.66  | 1.93  | 9.24  | 7.45  |
| TPSSh    | -52.46 | 7.33  | 3.41  | 7.77  | 7.55  |
| PBE      | -49.70 | 4.56  | 0.53  | 10.65 | 7.61  |
| M06-L    | -50.80 | 5.67  | 1.06  | 10.11 | 7.89  |
| TPSS     | -52.74 | 7.61  | -0.12 | 11.30 | 9.45  |
| GAM      | -53.32 | 8.18  | -0.16 | 11.33 | 9.76  |
| revPBE   | -53.88 | 8.75  | -0.75 | 11.93 | 10.34 |
| M11-L    | -56.13 | 11.00 | -1.42 | 12.60 | 11.80 |
| OreLYP   | -57.49 | 12.36 | -1.23 | 12.40 | 12.38 |
| HLE17    | -60.85 | 15.72 | 0.21  | 10.96 | 13.34 |

**WMS**                    **-45.13**    **0.00**            **11.17**            **0.00**            **0.00**

<sup>a</sup>The energies are based on the geometries optimized by M06-2X/6-311+G(3d2f). All density functionals use the 6-311+G(3d2f) basis set, and WMS is the benchmark method.

<sup>b</sup>UD and MUD are unsigned deviation and mean unsigned deviation from the benchmark, respectively.

Table S2. Comparison of reaction energies ( $\Delta E$ , in kcal/mol) and forward reaction barriers ( $\Delta E^\ddagger$ , in kcal/mol) of some S-S bond cleavage reactions in solution calculated by two different model chemistries (Model1 and Model2).

| implicit solvent | S-S bond cleavage reaction                                                      | $\Delta E$ |        |      | $\Delta E^\ddagger$ |        |      |
|------------------|---------------------------------------------------------------------------------|------------|--------|------|---------------------|--------|------|
|                  |                                                                                 | Model1     | Model2 | UD   | Model1              | Model2 | UD   |
| DMSO             | $\text{Li}_2\text{S}_6 \rightarrow \text{LiS}_3^\bullet - \text{LiS}_3^\bullet$ | 6.85       | 6.84   | 0.01 | 17.43               | 17.45  | 0.02 |
|                  | $\text{LiS}_6^- \rightarrow \text{LiS}_3^\bullet - \text{S}_3^{\bullet-}$       | 7.08       | 7.08   | 0.00 | 13.87               | 13.88  | 0.01 |
|                  | $\text{S}_6^{2-} \rightarrow \text{S}_3^{\bullet-} - \text{S}_3^{\bullet-}$     | 7.42       | 7.45   | 0.03 | 8.53                | 8.58   | 0.05 |
| DOL              | $\text{Li}_2\text{S}_6 \rightarrow \text{LiS}_3^\bullet - \text{LiS}_3^\bullet$ | 6.92       | 6.92   | 0.00 | 17.23               | 17.25  | 0.02 |
|                  | $\text{LiS}_6^- \rightarrow \text{LiS}_3^\bullet - \text{S}_3^{\bullet-}$       | 6.20       | 6.20   | 0.00 | 13.06               | 13.05  | 0.01 |
|                  | $\text{S}_6^{2-} \rightarrow \text{S}_3^{\bullet-} - \text{S}_3^{\bullet-}$     | 8.28       | 8.33   | 0.05 | 9.25                | 9.30   | 0.05 |

Table S3. Comparison of binding energies ( $E_b$ , in kcal/mol) calculated by two different model chemistries (Model1 and Model2).

| implicit solvent | system                                 | $E_b$  |        |      |
|------------------|----------------------------------------|--------|--------|------|
|                  |                                        | Model1 | Model2 | UD   |
| DMSO             | $\text{Li}_2\text{S}_6 + \text{DMSO}$  | -17.37 | -17.30 | 0.07 |
|                  | $\text{LiS}_6^- + \text{DMSO}$         | -16.71 | -16.70 | 0.01 |
|                  | $\text{S}_6^{2-} + \text{DMSO}$        | -4.41  | -4.39  | 0.02 |
|                  | $\text{LiS}_3^{\bullet} + \text{DMSO}$ | -20.17 | -20.14 | 0.03 |
|                  | $\text{S}_3^{\bullet-} + \text{DMSO}$  | -3.40  | -3.38  | 0.02 |
| DOL              | $\text{Li}_2\text{S}_6 + \text{DOL}$   | -14.55 | -14.52 | 0.03 |
|                  | $\text{LiS}_6^- + \text{DOL}$          | -12.97 | -12.94 | 0.03 |
|                  | $\text{S}_6^{2-} + \text{DOL}$         | -5.06  | -5.04  | 0.02 |
|                  | $\text{LiS}_3^{\bullet} + \text{DOL}$  | -15.02 | -15.02 | 0.00 |
|                  | $\text{S}_3^{\bullet-} + \text{DOL}$   | -3.45  | -3.46  | 0.01 |

Table S4. Interaction energies ( $\delta E$ , in kcal/mol) between two fragments inside a molecule and corresponding basis set superposition error (BSSE, in kcal/mol).

| molecule <sup>a</sup>        | fragment 1                   | fragment 2 | $\delta E^b$ | BSSE | $\frac{\delta E}{\text{BSSE}}$ |
|------------------------------|------------------------------|------------|--------------|------|--------------------------------|
| $\text{Li}^+(\text{DMSO})_4$ | $\text{Li}^+(\text{DMSO})_3$ | DMSO       | -34.43       | 1.54 | 4.48%                          |
| $\text{Li}^+(\text{DMSO})_5$ | $\text{Li}^+(\text{DMSO})_4$ | DMSO       | -26.24       | 1.65 | 6.30%                          |
| $\text{Li}^+(\text{DMSO})_6$ | $\text{Li}^+(\text{DMSO})_5$ | DMSO       | -27.44       | 2.03 | 7.41%                          |
| $\text{Li}^+(\text{DOL})_4$  | $\text{Li}^+(\text{DOL})_3$  | DOL        | -26.55       | 1.47 | 5.55%                          |
| $\text{Li}^+(\text{DOL})_5$  | $\text{Li}^+(\text{DOL})_4$  | DOL        | -20.47       | 1.69 | 8.26%                          |
| $\text{Li}^+(\text{DOL})_6$  | $\text{Li}^+(\text{DOL})_5$  | DOL        | -23.08       | 1.93 | 8.35%                          |

<sup>a</sup>The molecule consists of fragment 1 and fragment 2.

<sup>b</sup> $\delta E$  are calculated by the difference of potential energies between the molecule and the fragments in gas phase because corresponding BSSE corrections are also estimated at the same level.

## 2. Calculation setups for simulating different solvent systems based on the SMD solvation model

Table S5. Calculation setups in Gaussian 09 program for different solvent systems.

| solvent | keywords                              | parameters <sup>a</sup>                                                                                                                                                                                                |
|---------|---------------------------------------|------------------------------------------------------------------------------------------------------------------------------------------------------------------------------------------------------------------------|
| DMSO    | <i>scrf=(smd,solvent=dms0)</i>        | <i>eps=7.34</i><br><i>epsinf=1.396</i><br><i>HBondAcidity=0.00</i>                                                                                                                                                     |
| DOL     | <i>scrf(read,SMD,solvent=generic)</i> | <i>HBondBasicity=0.64</i><br><i>SurfaceTensionAtInterface=46.85</i><br><i>CarbonAromaticity=0.00</i><br><i>ElectronegativeHalogenicity=0.00</i>                                                                        |
| DMA     | <i>scrf(read,SMD,solvent=generic)</i> | <i>eps=37.781</i><br><i>epsinf=2.062</i><br><i>HBondAcidity=0.00</i><br><i>HBondBasicity=0.7</i><br><i>SurfaceTensionAtInterface=47.62</i><br><i>CarbonAromaticity=0.00</i><br><i>ElectronegativeHalogenicity=0.00</i> |

<sup>a</sup>No external SMD calculation parameters are used for DMSO, because DMSO is incorporated in the internal solvent database of Gaussian 09.

### 3. Structures and stability of sulfur species and $\text{Li}^+$ in solution

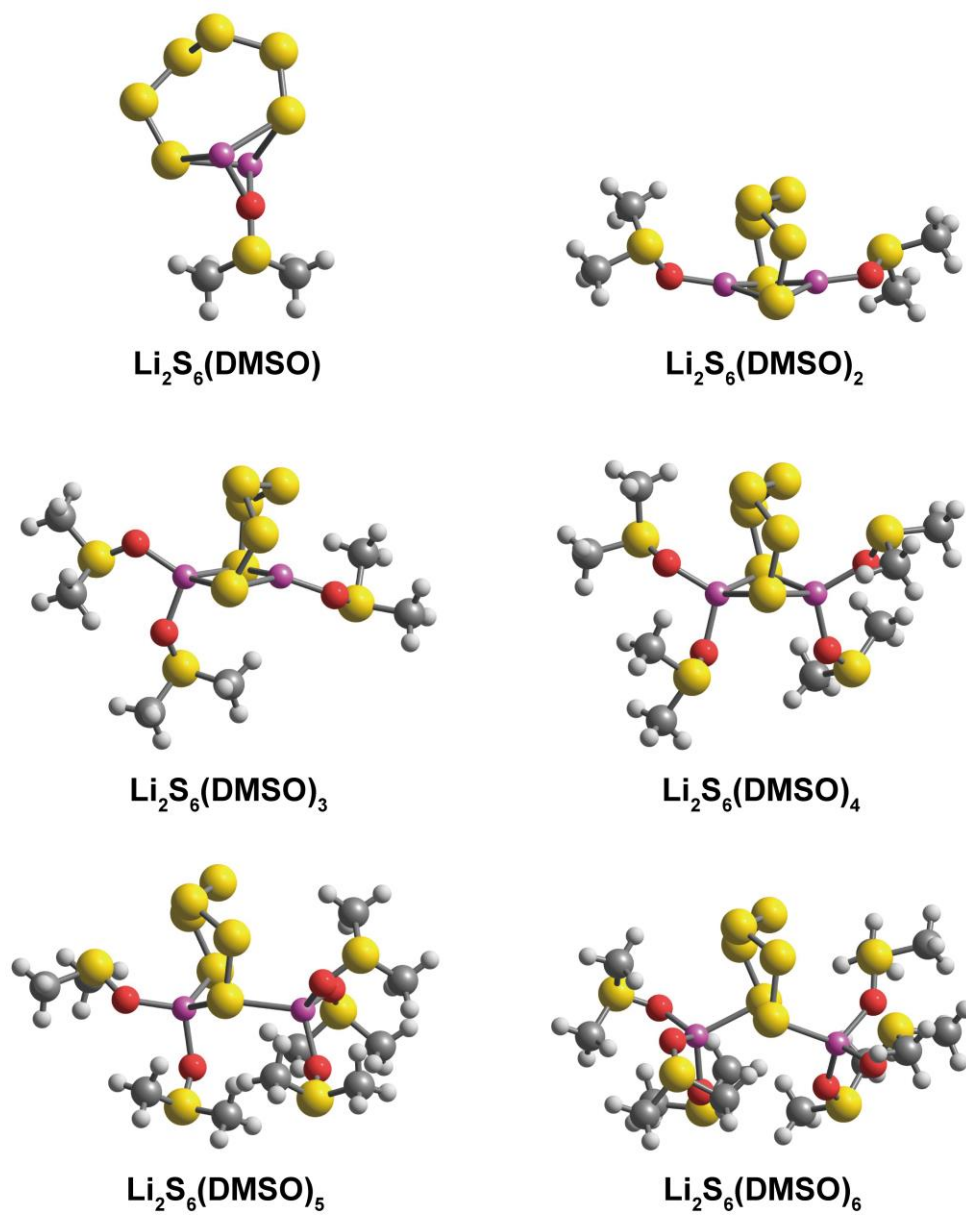

Fig. S1. Optimized solvation structures of  $\text{Li}_2\text{S}_6$  in DMSO. Color scheme: H, light gray; Li, purple; C, gray; O, red; S, yellow.

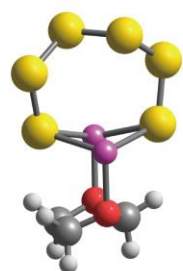

$\text{Li}_2\text{S}_6(\text{DOL})$

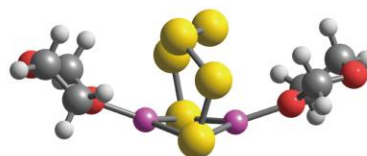

$\text{Li}_2\text{S}_6(\text{DOL})_2$

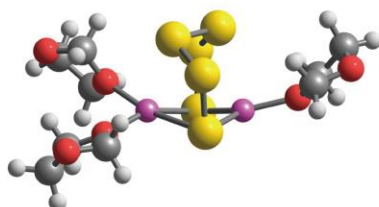

$\text{Li}_2\text{S}_6(\text{DOL})_3$

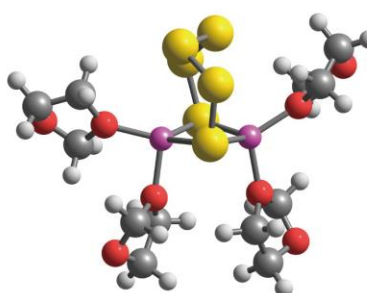

$\text{Li}_2\text{S}_6(\text{DOL})_4$

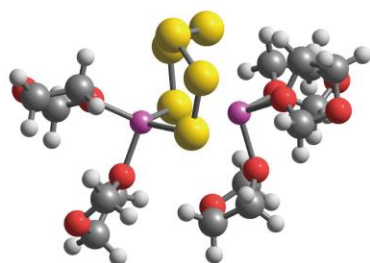

$\text{Li}_2\text{S}_6(\text{DOL})_5$

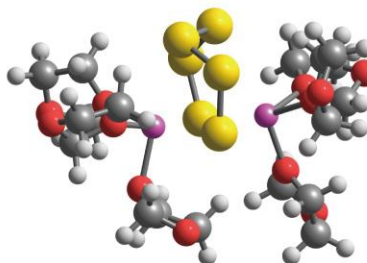

$\text{Li}_2\text{S}_6(\text{DOL})_6$

Fig. S2. Optimized solvation structures of  $\text{Li}_2\text{S}_6$  in DOL.



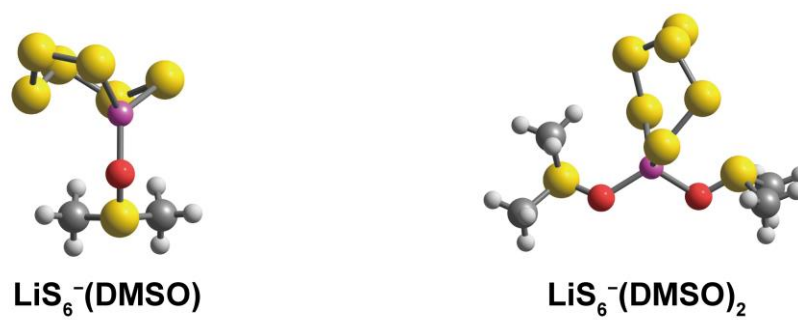

Fig. S3. Optimized solvation structures of  $\text{LiS}_6^-$  in DMSO.

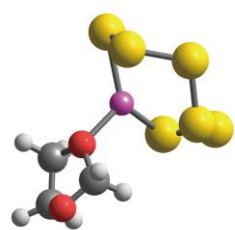

**$\text{LiS}_6^-(\text{DOL})$**

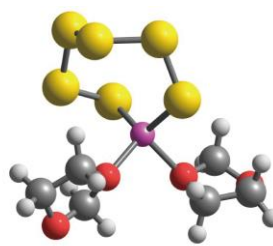

**$\text{LiS}_6^-(\text{DOL})_2$**

Fig. S4. Optimized solvation structures of  $\text{LiS}_6^-$  in DOL.

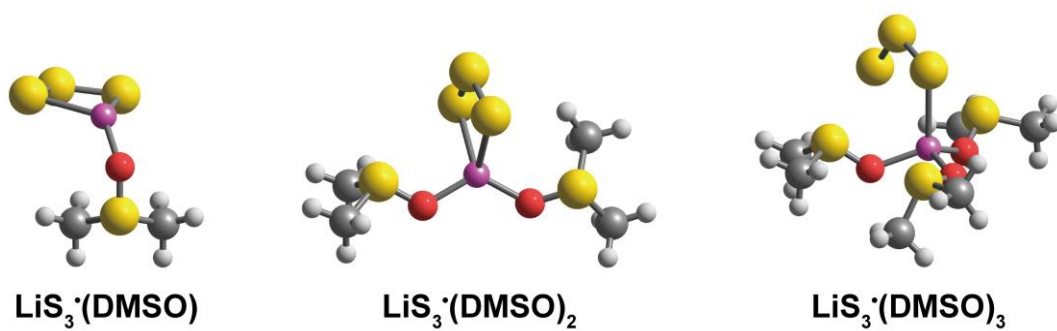

Fig. S5. Optimized solvation structures of  $\text{LiS}_3^+$  in DMSO.

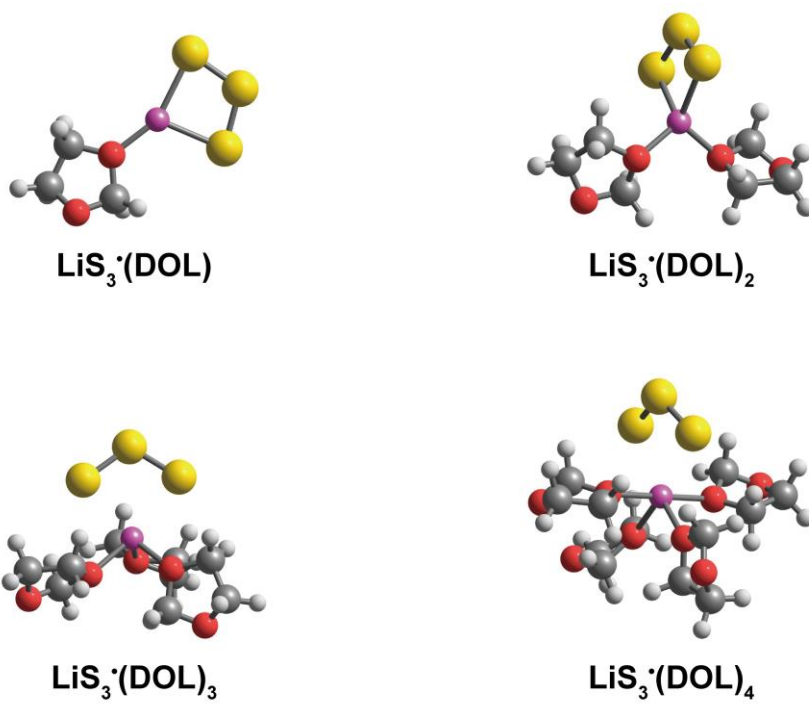

Fig. S6. Optimized solvation structures of LiS<sub>3</sub>\* in DOL.

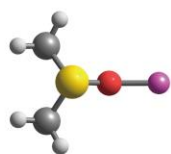

**Li<sup>+</sup>(DMSO)**

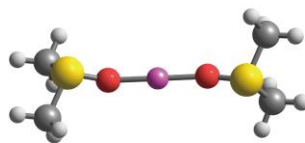

**Li<sup>+</sup>(DMSO)<sub>2</sub>**

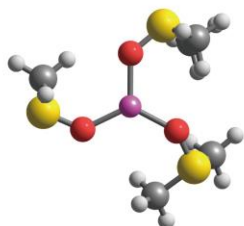

**Li<sup>+</sup>(DMSO)<sub>3</sub>**

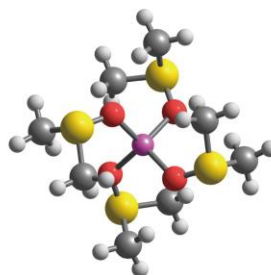

**Li<sup>+</sup>(DMSO)<sub>4</sub>**

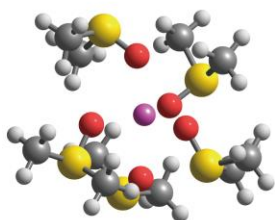

**Li<sup>+</sup>(DMSO)<sub>5</sub>**

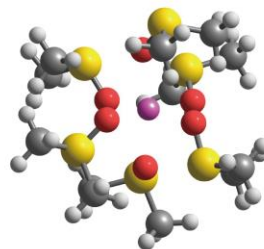

**Li<sup>+</sup>(DMSO)<sub>6</sub>**

Fig. S7. Optimized solvation structures of Li<sup>+</sup> in DMSO.

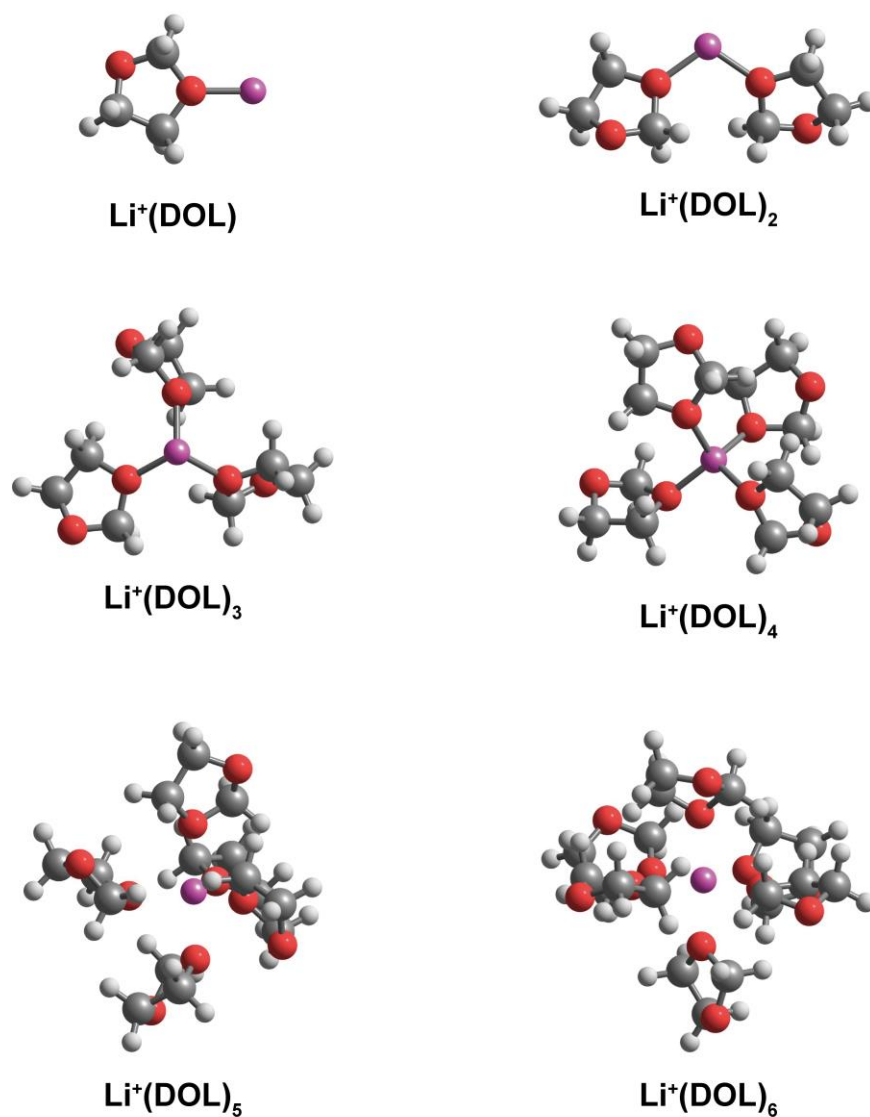

Fig. S8. Optimized solvation structures of  $\text{Li}^+$  in DOL.

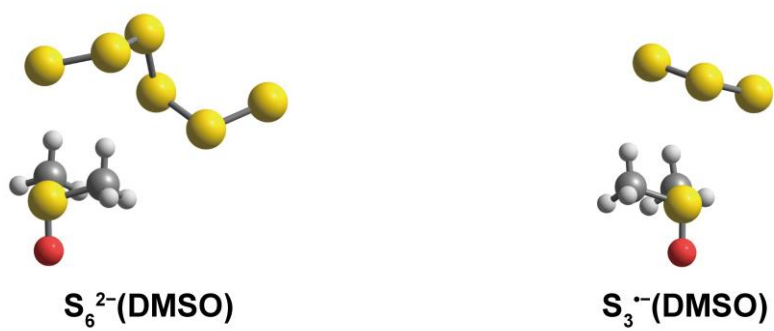

Fig. S9. Optimized solvation structures of  $S_6^{2-}$  and  $S_3^{+}$  in DMSO.

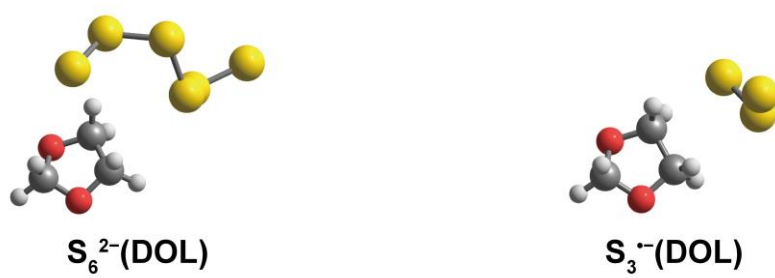

Fig. S10. Optimized solvation structures of  $S_6^{2-}$  and  $S_3^{*-}$  in DOL.



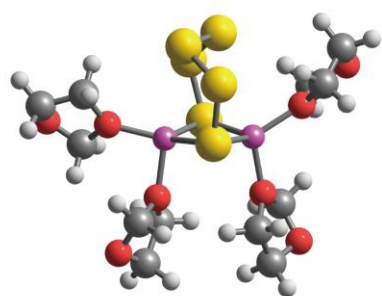

$\text{Li}_2\text{S}_6(\text{DOL})_4$

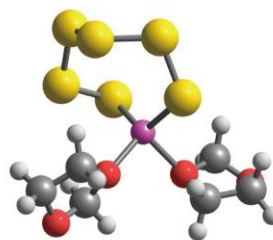

$\text{LiS}_6^-(\text{DOL})_2$

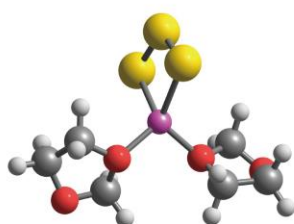

$\text{LiS}_3^-(\text{DOL})_2$

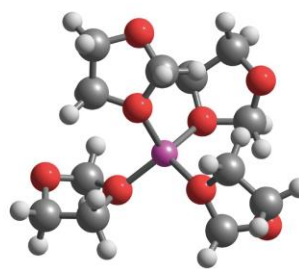

$\text{Li}^+(\text{DOL})_4$

Fig. S11. Optimized solvation structures of  $\text{Li}_2\text{S}_6$ ,  $\text{LiS}_6^-$ ,  $\text{LiS}_3^-$ , and  $\text{Li}^+$  with the best NCS in DOL.

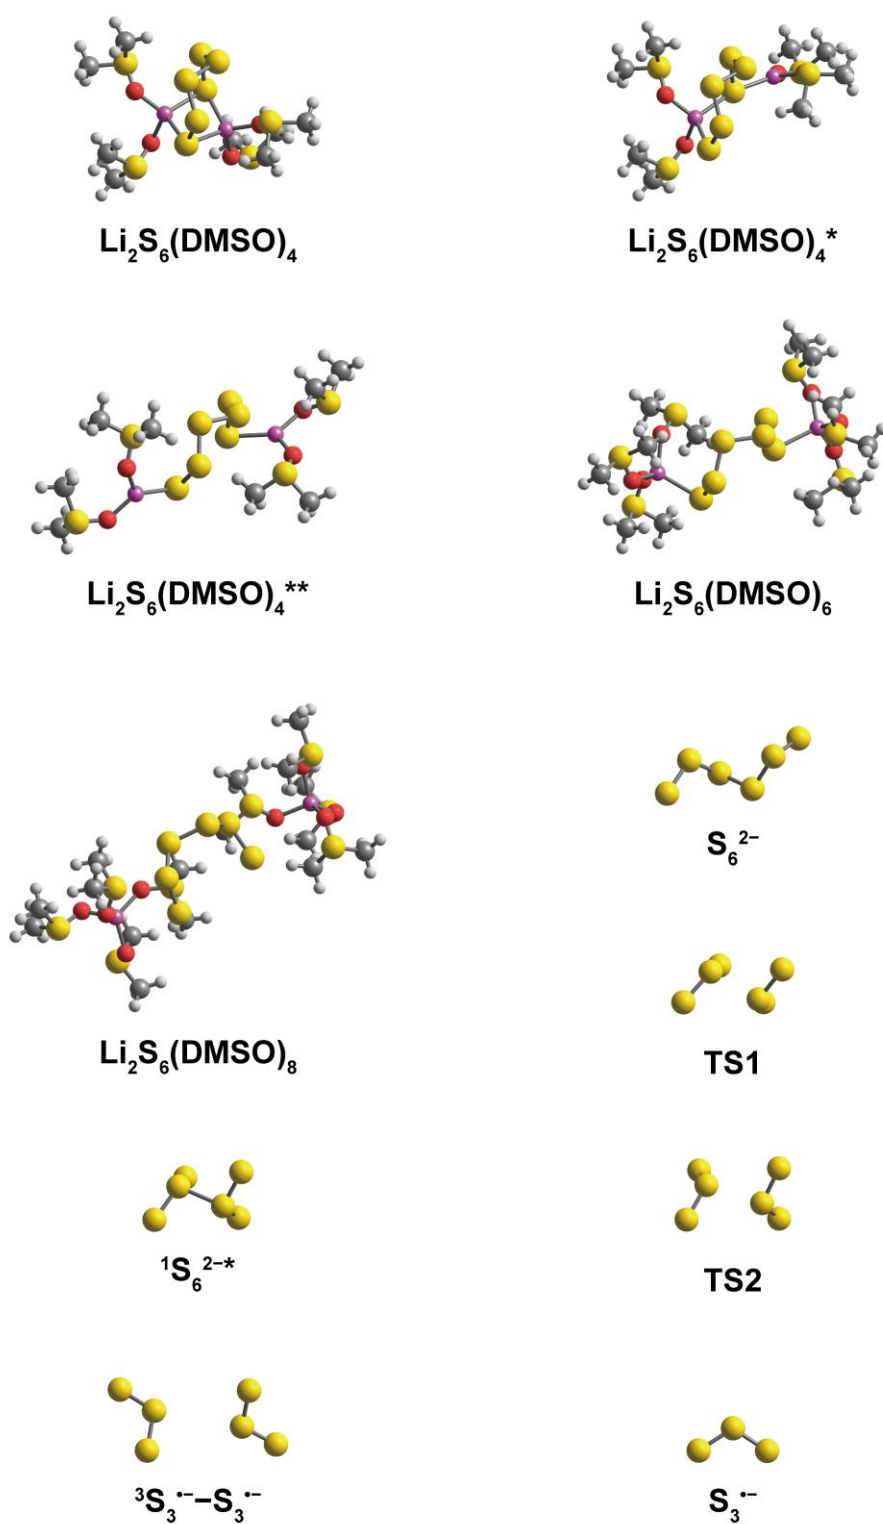

Fig. S12. Optimized intermediate or transition state solvation structures in the reaction of  $\text{Li}_2\text{S}_6(\text{DMSO})_4 + 4\text{DMSO} \rightarrow 2\text{S}_3^{\cdot-} + 2\text{Li}^+(\text{DMSO})_4$ .

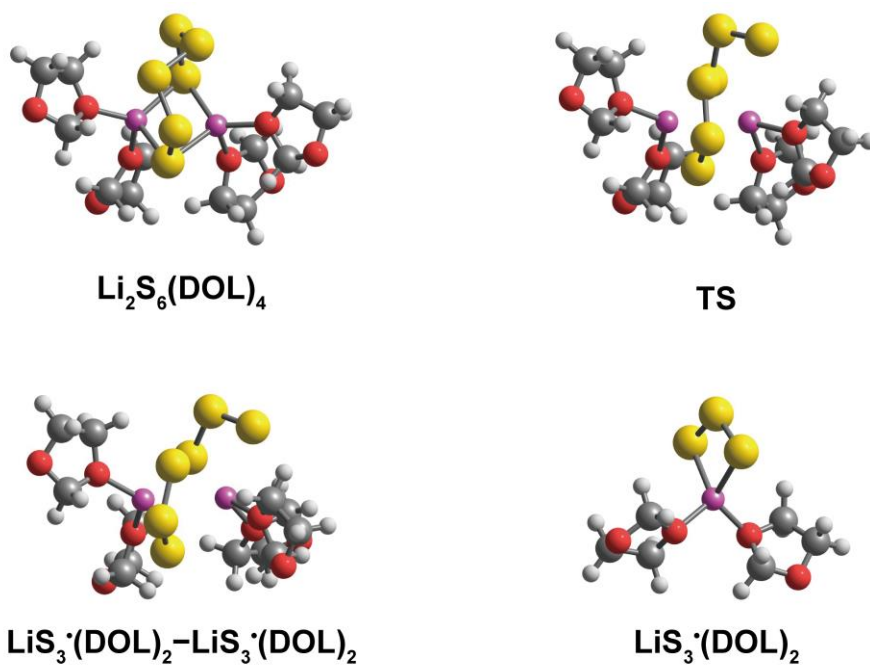

Fig. S13. Optimized intermediate or transition state solvation structures in the reaction of  $\text{Li}_2\text{S}_6(\text{DOL})_4 \rightarrow 2\text{LiS}_3(\text{DOL})_2$ .

Table S6. Energy components of interactions (in kcal/mol) between two fragments inside a molecule.

| molecule <sup>a</sup>               | fragment 1                          | fragment 2 | interactions between two fragments <sup>b</sup> |          |           |            |
|-------------------------------------|-------------------------------------|------------|-------------------------------------------------|----------|-----------|------------|
|                                     |                                     |            | electrostatics                                  | exchange | induction | dispersion |
| Li <sup>+</sup> (DMSO) <sub>4</sub> | Li <sup>+</sup> (DMSO) <sub>3</sub> | DMSO       | -34.86                                          | 28.18    | -12.01    | -13.18     |
| Li <sup>+</sup> (DMSO) <sub>5</sub> | Li <sup>+</sup> (DMSO) <sub>4</sub> | DMSO       | -27.45                                          | 26.48    | -8.80     | -14.25     |
| Li <sup>+</sup> (DOL) <sub>4</sub>  | Li <sup>+</sup> (DOL) <sub>3</sub>  | DOL        | -23.68                                          | 19.19    | -9.27     | -10.37     |
| Li <sup>+</sup> (DOL) <sub>5</sub>  | Li <sup>+</sup> (DOL) <sub>4</sub>  | DOL        | -20.92                                          | 24.68    | -6.38     | -15.13     |

<sup>a</sup>The molecule consists of fragment 1 and fragment 2.

<sup>b</sup>This energy decomposition analysis based on symmetry-adapted perturbation theory (SAPT)<sup>2</sup> is performed by PSI4 1.4 software<sup>3</sup> with SAPT2+/aug-cc-pVDZ method in gas phase to understand the non-covalent interactions. The interaction energy between two fragments can be divided into four parts: electrostatics, exchange, induction, and dispersion.

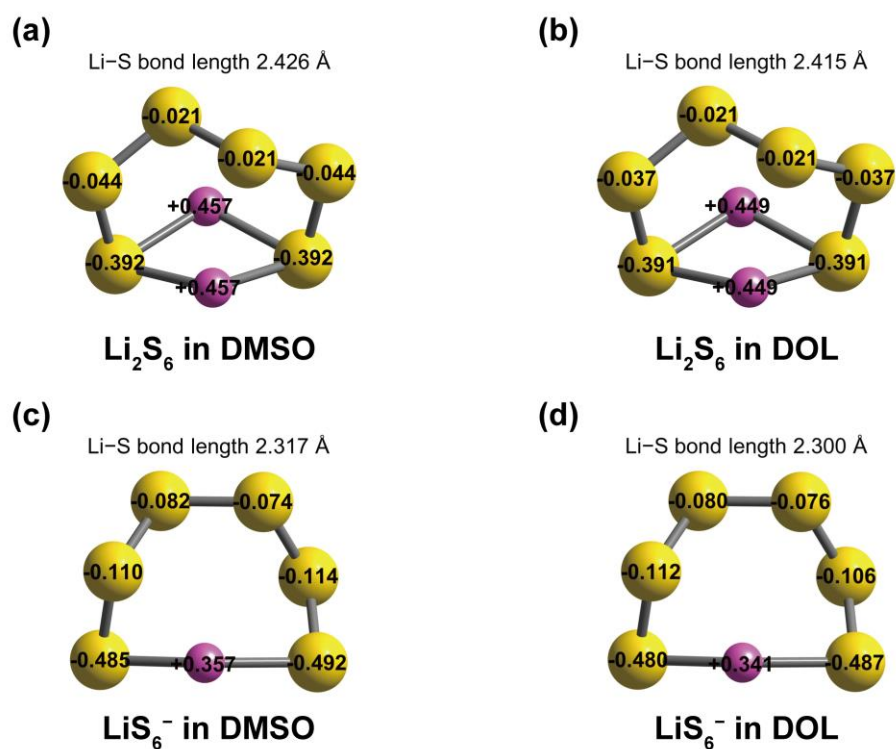

Fig. S14. Charge distribution and average Li-S bond lengths of (a) Li<sub>2</sub>S<sub>6</sub> in DMSO; (b) Li<sub>2</sub>S<sub>6</sub> in DOL; (c) LiS<sub>6</sub><sup>-</sup> in DMSO; (d) LiS<sub>6</sub><sup>-</sup> in DOL. Here no explicit solvent molecules but implicit polarity environment are considered. The atomic charges are quantified based on the CM5 charge model.<sup>4</sup>

Table S7. Bond dissociation energies ( $\Delta E$ , in kcal/mol) of Li-S and S-S bond.

| bond | $\Delta E^a$ |        |
|------|--------------|--------|
|      | in DMSO      | in DOL |
| Li-S | 98.28        | 94.78  |
| S-S  | 107.53       | 107.67 |

<sup>a</sup>Dissociation energy of A-B bond is estimated by the reaction energy of homolytic bond cleavage reaction ( $A + B \rightarrow A\cdot + B\cdot$ ).

#### 4. Energetics of relevant reactions in the generation of radicals in solution

Table S8. Reaction free energies ( $\Delta G_r$ , in kcal/mol) of R1 when considering the solvation structures with all possible NCS.

| coefficient in R1 <sup>a</sup> |   |   |   | $\Delta G_r^b$ |              | coefficient in R1 |   |   |   | $\Delta G_r$  |              |
|--------------------------------|---|---|---|----------------|--------------|-------------------|---|---|---|---------------|--------------|
| m                              | n | p | q | DMSO           | DOL          | m                 | n | p | q | DMSO          | DOL          |
| 2                              | 0 | 1 | 1 | <b>15.17</b>   | <b>30.42</b> | 5                 | 0 | 1 | 4 | <b>-3.47</b>  | 13.49        |
| 3                              | 0 | 1 | 2 | <b>7.84</b>    | <b>23.00</b> | 5                 | 0 | 2 | 3 | 1.38          | 16.70        |
| 3                              | 0 | 2 | 1 | 17.50          | 28.24        | 5                 | 1 | 1 | 5 | 8.25          | 15.43        |
| 4                              | 0 | 1 | 3 | 2.30           | 20.78        | 5                 | 1 | 2 | 4 | <b>-3.47</b>  | <b>12.48</b> |
| 4                              | 0 | 2 | 2 | 8.23           | 25.67        | 5                 | 2 | 1 | 6 | 15.47         | 26.44        |
| 4                              | 1 | 1 | 4 | <b>-2.55</b>   | 16.57        | 5                 | 2 | 2 | 5 | 8.25          | 14.41        |
| 4                              | 1 | 2 | 3 | 2.31           | 19.77        | 5                 | 3 | 2 | 6 | 15.48         | 25.43        |
| 4                              | 2 | 1 | 5 | 9.17           | 18.50        | 6                 | 0 | 1 | 5 | -1.93         | 10.41        |
| 4                              | 2 | 2 | 4 | <b>-2.54</b>   | <b>15.55</b> | 6                 | 0 | 2 | 4 | <b>-13.64</b> | <b>7.46</b>  |
| 4                              | 3 | 1 | 6 | 16.40          | 29.52        | 6                 | 1 | 1 | 6 | 5.30          | 21.42        |
| 4                              | 3 | 2 | 5 | 9.18           | 17.49        | 6                 | 1 | 2 | 5 | -1.92         | 9.39         |
| 4                              | 4 | 2 | 6 | 16.41          | 28.50        | 6                 | 2 | 2 | 6 | 5.31          | 20.41        |

<sup>a</sup>R1:  $\text{Li}_2\text{S}_6(\text{sol})_m + n\text{sol} \rightarrow \text{LiS}_6^-(\text{sol})_p + \text{Li}^+(\text{sol})_q$ .

<sup>b</sup>The lowest  $\Delta G_r$  are in bold for each NCS in reactants.

Table S9. Reaction free energies ( $\Delta G_r$ , in kcal/mol) of R2 when considering the solvation structures with all possible NCS.

| coefficient in R2 <sup>a</sup> |   |   |   | $\Delta G_r^b$ |              | coefficient in R2 |   |   |   | $\Delta G_r$  |              |
|--------------------------------|---|---|---|----------------|--------------|-------------------|---|---|---|---------------|--------------|
| m                              | n | p | q | DMSO           | DOL          | m                 | n | p | q | DMSO          | DOL          |
| 2                              | 0 | 1 | 1 | <b>36.49</b>   | <b>76.29</b> | 5                 | 2 | 2 | 5 | 19.92         | 55.05        |
| 3                              | 0 | 1 | 2 | <b>29.16</b>   | <b>68.87</b> | 5                 | 2 | 3 | 4 | 2.28          | 47.21        |
| 3                              | 0 | 2 | 1 | <b>29.16</b>   | <b>68.87</b> | 5                 | 2 | 4 | 3 | 2.28          | 47.21        |
| 4                              | 0 | 1 | 3 | 23.63          | 66.66        | 5                 | 2 | 5 | 2 | 19.92         | 55.05        |
| 4                              | 0 | 2 | 2 | 19.89          | 66.30        | 5                 | 2 | 6 | 1 | 36.80         | 72.32        |
| 4                              | 0 | 3 | 1 | 23.63          | 66.66        | 5                 | 3 | 2 | 6 | 27.15         | 66.06        |
| 4                              | 1 | 1 | 4 | 18.78          | 62.44        | 5                 | 3 | 3 | 5 | 14.00         | 49.15        |
| 4                              | 1 | 2 | 3 | 13.97          | 60.40        | 5                 | 3 | 4 | 4 | <b>-2.57</b>  | <b>43.00</b> |
| 4                              | 1 | 3 | 2 | 13.97          | 60.40        | 5                 | 3 | 5 | 3 | 14.00         | 49.15        |
| 4                              | 1 | 4 | 1 | 18.78          | 62.44        | 5                 | 3 | 6 | 2 | 27.15         | 66.06        |
| 4                              | 2 | 1 | 5 | 30.50          | 64.37        | 5                 | 4 | 3 | 6 | 21.23         | 60.16        |
| 4                              | 2 | 2 | 4 | 9.12           | 56.19        | 5                 | 4 | 4 | 5 | 9.15          | 44.93        |
| 4                              | 2 | 3 | 3 | 8.06           | 54.50        | 5                 | 4 | 5 | 4 | 9.15          | 44.93        |
| 4                              | 2 | 4 | 2 | 9.12           | 56.19        | 5                 | 4 | 6 | 3 | 21.23         | 60.16        |
| 4                              | 2 | 5 | 1 | 30.50          | 64.37        | 5                 | 5 | 4 | 6 | 16.38         | 55.95        |
| 4                              | 3 | 1 | 6 | 37.72          | 75.39        | 5                 | 5 | 5 | 5 | 20.87         | 46.86        |
| 4                              | 3 | 2 | 5 | 20.84          | 58.12        | 5                 | 5 | 6 | 4 | 16.38         | 55.95        |
| 4                              | 3 | 3 | 4 | 3.21           | 50.29        | 5                 | 6 | 5 | 6 | 28.10         | 57.88        |
| 4                              | 3 | 4 | 3 | 3.21           | 50.29        | 5                 | 6 | 6 | 5 | 28.10         | 57.88        |
| 4                              | 3 | 5 | 2 | 20.84          | 58.12        | 5                 | 7 | 6 | 6 | 35.33         | 68.89        |
| 4                              | 3 | 6 | 1 | 37.72          | 75.39        | 6                 | 0 | 1 | 5 | 19.40         | 56.28        |
| 4                              | 4 | 2 | 6 | 28.07          | 69.14        | 6                 | 0 | 2 | 4 | -1.97         | 48.09        |
| 4                              | 4 | 3 | 5 | 14.93          | 52.22        | 6                 | 0 | 3 | 3 | -3.04         | 46.41        |
| 4                              | 4 | 4 | 4 | <b>-1.64</b>   | <b>46.07</b> | 6                 | 0 | 4 | 2 | -1.97         | 48.09        |
| 4                              | 4 | 5 | 3 | 14.93          | 52.22        | 6                 | 0 | 5 | 1 | 19.40         | 56.28        |
| 4                              | 4 | 6 | 2 | 28.07          | 69.14        | 6                 | 1 | 1 | 6 | 26.63         | 67.29        |
| 4                              | 5 | 3 | 6 | 22.16          | 63.24        | 6                 | 1 | 2 | 5 | 9.75          | 50.03        |
| 4                              | 5 | 4 | 5 | 10.08          | 48.00        | 6                 | 1 | 3 | 4 | -7.89         | 42.19        |
| 4                              | 5 | 5 | 4 | 10.08          | 48.00        | 6                 | 1 | 4 | 3 | -7.89         | 42.19        |
| 4                              | 5 | 6 | 3 | 22.16          | 63.24        | 6                 | 1 | 5 | 2 | 9.75          | 50.03        |
| 4                              | 6 | 4 | 6 | 17.30          | 59.02        | 6                 | 1 | 6 | 1 | 26.63         | 67.29        |
| 4                              | 6 | 5 | 5 | 21.80          | 49.94        | 6                 | 2 | 2 | 6 | 16.97         | 61.04        |
| 4                              | 6 | 6 | 4 | 17.30          | 59.02        | 6                 | 2 | 3 | 5 | 3.83          | 44.13        |
| 4                              | 7 | 5 | 6 | 29.02          | 60.95        | 6                 | 2 | 4 | 4 | <b>-12.74</b> | <b>37.97</b> |
| 4                              | 7 | 6 | 5 | 29.02          | 60.95        | 6                 | 2 | 5 | 3 | 3.83          | 44.13        |
| 4                              | 8 | 6 | 6 | 36.25          | 71.97        | 6                 | 2 | 6 | 2 | 16.97         | 61.04        |
| 5                              | 0 | 1 | 4 | 17.85          | 59.37        | 6                 | 3 | 3 | 6 | 11.06         | 55.14        |
| 5                              | 0 | 2 | 3 | 13.05          | 57.33        | 6                 | 3 | 4 | 5 | -1.02         | 39.91        |



|   |   |   |   |       |       |   |   |   |   |       |       |
|---|---|---|---|-------|-------|---|---|---|---|-------|-------|
| 5 | 0 | 3 | 2 | 13.05 | 57.33 | 6 | 3 | 5 | 4 | -1.02 | 39.91 |
| 5 | 0 | 4 | 1 | 17.85 | 59.37 | 6 | 3 | 6 | 3 | 11.06 | 55.14 |
| 5 | 1 | 1 | 5 | 29.57 | 61.30 | 6 | 4 | 4 | 6 | 6.21  | 50.92 |
| 5 | 1 | 2 | 4 | 8.20  | 53.11 | 6 | 4 | 5 | 5 | 10.70 | 41.84 |
| 5 | 1 | 3 | 3 | 7.13  | 51.43 | 6 | 4 | 6 | 4 | 6.21  | 50.92 |
| 5 | 1 | 4 | 2 | 8.20  | 53.11 | 6 | 5 | 5 | 6 | 17.93 | 52.86 |
| 5 | 1 | 5 | 1 | 29.57 | 61.30 | 6 | 5 | 6 | 5 | 17.93 | 52.86 |
| 5 | 2 | 1 | 6 | 36.80 | 72.32 | 6 | 6 | 6 | 6 | 25.15 | 63.87 |

<sup>a</sup>R2:  $\text{Li}_2\text{S}_6(\text{sol})_m + n\text{sol} \rightarrow \text{S}_6^{2-} + \text{Li}^+(\text{sol})_p + \text{Li}^+(\text{sol})_q$ .

<sup>b</sup>The lowest  $\Delta G_r$  are in bold for each NCS in reactants.

Table S10. Reaction free energies ( $\Delta G_r$ , in kcal/mol) of R3 when considering the solvation structures with all possible NCS.

| coefficient in R3 <sup>a</sup> |   |   | $\Delta G_r^b$ |              |
|--------------------------------|---|---|----------------|--------------|
| m                              | n | p | DMSO           | DOL          |
| 1                              | 0 | 1 | <b>21.33</b>   | <b>45.87</b> |
| 2                              | 0 | 2 | 11.66          | 40.64        |
| 2                              | 1 | 3 | 5.75           | 34.73        |
| 2                              | 2 | 4 | <b>0.90</b>    | <b>30.52</b> |
| 2                              | 3 | 5 | 12.62          | 32.45        |
| 2                              | 4 | 6 | 19.85          | 43.47        |

<sup>a</sup>R3:  $\text{LiS}_6^-(\text{sol})_m + n\text{sol} \rightarrow \text{S}_6^{2-} + \text{Li}^+(\text{sol})_p$ .

<sup>b</sup>The lowest  $\Delta G_r$  are in bold for each NCS in reactants.

Table S11. Reaction free energies ( $\Delta G_r$ , in kcal/mol) of R4 when considering the solvation structures with all possible NCS.

| coefficient in R4 <sup>a</sup> |    |   |   | $\Delta G_r^b$ |              | coefficient in R4 |    |   |   | $\Delta G_r$ |             |
|--------------------------------|----|---|---|----------------|--------------|-------------------|----|---|---|--------------|-------------|
| m                              | n  | p | q | DMSO           | DOL          | m                 | n  | p | q | DMSO         | DOL         |
| 2                              | 0  | 1 | 1 | <b>14.95</b>   | <b>18.85</b> | 5                 | 0  | 2 | 3 | 7.21         | 10.05       |
| 3                              | 0  | 1 | 2 | <b>11.86</b>   | <b>12.90</b> | 5                 | 0  | 3 | 2 | 7.21         | 10.05       |
| 3                              | 0  | 2 | 1 | 11.86          | 12.90        | 5                 | 0  | 4 | 1 | N/A          | 18.38       |
| 4                              | 0  | 1 | 3 | 13.55          | 17.91        | 5                 | 1  | 2 | 4 | N/A          | 13.59       |
| 4                              | 0  | 2 | 2 | <b>6.82</b>    | <b>11.80</b> | 5                 | 1  | 3 | 3 | 8.52         | 11.38       |
| 4                              | 0  | 3 | 1 | 13.55          | 17.91        | 5                 | 1  | 4 | 2 | N/A          | 13.59       |
| 4                              | 1  | 1 | 4 | N/A            | 21.45        | 5                 | 2  | 3 | 4 | N/A          | 14.91       |
| 4                              | 1  | 2 | 3 | 8.13           | 13.12        | 5                 | 2  | 4 | 3 | N/A          | 14.91       |
| 4                              | 1  | 3 | 2 | 8.13           | 13.12        | 5                 | 3  | 4 | 4 | N/A          | 18.45       |
| 4                              | 1  | 4 | 1 | N/A            | 21.45        | 6                 | -2 | 2 | 2 | <b>-4.27</b> | <b>3.70</b> |
| 4                              | 2  | 2 | 4 | N/A            | 16.66        | 6                 | -1 | 2 | 3 | -2.96        | 5.03        |
| 4                              | 2  | 3 | 3 | 9.44           | 14.45        | 6                 | -1 | 3 | 2 | -2.96        | 5.03        |
| 4                              | 2  | 4 | 2 | N/A            | 16.66        | 6                 | 0  | 2 | 4 | N/A          | 8.57        |
| 4                              | 3  | 3 | 4 | N/A            | 17.99        | 6                 | 0  | 3 | 3 | -1.66        | 6.35        |
| 4                              | 3  | 4 | 3 | N/A            | 17.99        | 6                 | 0  | 4 | 2 | N/A          | 8.57        |
| 4                              | 4  | 4 | 4 | N/A            | 21.53        | 6                 | 1  | 3 | 4 | N/A          | 9.89        |
| 5                              | -1 | 2 | 2 | <b>5.90</b>    | <b>8.73</b>  | 6                 | 1  | 4 | 3 | N/A          | 9.89        |
| 5                              | 0  | 1 | 4 | N/A            | 18.38        | 6                 | 2  | 4 | 4 | N/A          | 13.43       |

<sup>a</sup>R4:  $\text{Li}_2\text{S}_6(\text{sol})_m + n\text{sol} \rightarrow \text{LiS}_3^+(\text{sol})_p + \text{LiS}_3^-(\text{sol})_q$ .

<sup>b</sup>The lowest  $\Delta G_r$  are in bold for each NCS in reactants.

Table S12. Reaction free energies ( $\Delta G_r$ , in kcal/mol) of R5 when considering the solvation structures with all possible NCS.

| coefficient in R5 <sup>a</sup> |   |   |   | $\Delta G_r^b$ |              | coefficient in R5 |   |   |   | $\Delta G_r$ |              |
|--------------------------------|---|---|---|----------------|--------------|-------------------|---|---|---|--------------|--------------|
| m                              | n | p | q | DMSO           | DOL          | m                 | n | p | q | DMSO         | DOL          |
| 2                              | 0 | 1 | 1 | <b>25.48</b>   | <b>43.75</b> | 5                 | 1 | 5 | 1 | 18.56        | 28.76        |
| 3                              | 0 | 2 | 1 | <b>18.15</b>   | <b>36.33</b> | 5                 | 1 | 4 | 2 | <b>1.42</b>  | <b>22.04</b> |
| 3                              | 0 | 1 | 2 | 22.38          | 37.80        | 5                 | 1 | 3 | 3 | 7.58         | 27.58        |
| 4                              | 0 | 3 | 1 | 12.61          | 34.11        | 5                 | 1 | 2 | 4 | N/A          | 37.02        |
| 4                              | 0 | 2 | 2 | 13.11          | 35.23        | 5                 | 2 | 6 | 1 | 25.78        | 39.77        |
| 4                              | 0 | 1 | 3 | 24.08          | 42.80        | 5                 | 2 | 5 | 2 | 13.14        | 23.97        |
| 4                              | 1 | 4 | 1 | 7.76           | 29.90        | 5                 | 2 | 4 | 3 | 2.73         | 23.36        |
| 4                              | 1 | 3 | 2 | 7.20           | 29.33        | 5                 | 2 | 3 | 4 | N/A          | 31.12        |
| 4                              | 1 | 2 | 3 | 14.42          | 36.55        | 5                 | 3 | 6 | 2 | 20.37        | 34.98        |
| 4                              | 1 | 1 | 4 | N/A            | 46.34        | 5                 | 3 | 5 | 3 | 14.45        | 25.29        |
| 4                              | 2 | 5 | 1 | 19.48          | 31.83        | 5                 | 3 | 4 | 4 | N/A          | 26.90        |
| 4                              | 2 | 4 | 2 | <b>2.35</b>    | <b>25.11</b> | 5                 | 4 | 6 | 3 | 21.68        | 36.31        |
| 4                              | 2 | 3 | 3 | 8.51           | 30.65        | 5                 | 4 | 5 | 4 | N/A          | 28.83        |
| 4                              | 2 | 2 | 4 | N/A            | 40.09        | 5                 | 5 | 6 | 4 | N/A          | 39.85        |
| 4                              | 3 | 6 | 1 | 26.71          | 42.85        | 6                 | 0 | 5 | 1 | 8.38         | 23.74        |
| 4                              | 3 | 5 | 2 | 14.07          | 27.04        | 6                 | 0 | 4 | 2 | <b>-8.75</b> | <b>17.01</b> |
| 4                              | 3 | 4 | 3 | 3.65           | 26.43        | 6                 | 0 | 3 | 3 | -2.59        | 22.56        |
| 4                              | 3 | 3 | 4 | N/A            | 34.19        | 6                 | 0 | 2 | 4 | N/A          | 32.00        |
| 4                              | 4 | 6 | 2 | 21.29          | 38.06        | 6                 | 1 | 6 | 1 | 15.61        | 34.75        |
| 4                              | 4 | 5 | 3 | 15.37          | 28.37        | 6                 | 1 | 5 | 2 | 2.97         | 18.95        |
| 4                              | 4 | 4 | 4 | N/A            | 29.97        | 6                 | 1 | 4 | 3 | -7.44        | 18.34        |
| 4                              | 5 | 6 | 3 | 22.60          | 39.38        | 6                 | 1 | 3 | 4 | N/A          | 26.10        |
| 4                              | 5 | 5 | 4 | N/A            | 31.91        | 6                 | 2 | 6 | 2 | 10.20        | 29.96        |
| 4                              | 6 | 6 | 4 | N/A            | 42.92        | 6                 | 2 | 5 | 3 | 4.28         | 20.27        |
| 5                              | 0 | 4 | 1 | 6.84           | 26.82        | 6                 | 2 | 4 | 4 | N/A          | 21.88        |
| 5                              | 0 | 3 | 2 | 6.27           | 26.25        | 6                 | 3 | 6 | 3 | 11.50        | 31.29        |
| 5                              | 0 | 2 | 3 | 13.50          | 33.48        | 6                 | 3 | 5 | 4 | N/A          | 23.81        |
| 5                              | 0 | 1 | 4 | N/A            | 43.27        | 6                 | 4 | 6 | 4 | N/A          | 34.83        |

<sup>a</sup>R5:  $\text{Li}_2\text{S}_6(\text{sol})_m + n\text{sol} \rightarrow \text{S}_3^{2-} + \text{Li}^+(\text{sol})_p + \text{LiS}_3^+(\text{sol})_q$ .

<sup>b</sup>The lowest  $\Delta G_r$  are in bold for each NCS in reactants.

Table S13. Reaction free energies ( $\Delta G_r$ , in kcal/mol) of R6 when considering the solvation structures with all possible NCS.

| coefficient in R6 <sup>a</sup> |   |   |   | $\Delta G_r^b$ |              | coefficient in R6 |   |   |   | $\Delta G_r$  |              |
|--------------------------------|---|---|---|----------------|--------------|-------------------|---|---|---|---------------|--------------|
| m                              | n | p | q | DMSO           | DOL          | m                 | n | p | q | DMSO          | DOL          |
| 2                              | 0 | 1 | 1 | <b>36.00</b>   | <b>68.64</b> | 5                 | 2 | 2 | 5 | 19.43         | 47.40        |
| 3                              | 0 | 1 | 2 | <b>28.67</b>   | <b>61.22</b> | 5                 | 2 | 3 | 4 | 1.79          | 39.56        |
| 3                              | 0 | 2 | 1 | <b>28.67</b>   | <b>61.22</b> | 5                 | 2 | 4 | 3 | 1.79          | 39.56        |
| 4                              | 0 | 1 | 3 | 23.14          | 59.01        | 5                 | 2 | 5 | 2 | 19.43         | 47.40        |
| 4                              | 0 | 2 | 2 | 19.40          | 58.65        | 5                 | 2 | 6 | 1 | 36.31         | 64.66        |
| 4                              | 0 | 3 | 1 | 23.14          | 59.01        | 5                 | 3 | 2 | 6 | 26.66         | 58.41        |
| 4                              | 1 | 1 | 4 | 18.29          | 54.79        | 5                 | 3 | 3 | 5 | 13.51         | 41.50        |
| 4                              | 1 | 2 | 3 | 13.49          | 52.75        | 5                 | 3 | 4 | 4 | <b>-3.06</b>  | <b>35.35</b> |
| 4                              | 1 | 3 | 2 | 13.49          | 52.75        | 5                 | 3 | 5 | 3 | 13.51         | 41.50        |
| 4                              | 1 | 4 | 1 | 18.29          | 54.79        | 5                 | 3 | 6 | 2 | 26.66         | 58.41        |
| 4                              | 2 | 1 | 5 | 30.01          | 56.72        | 5                 | 4 | 3 | 6 | 20.74         | 52.51        |
| 4                              | 2 | 2 | 4 | 8.63           | 48.54        | 5                 | 4 | 4 | 5 | 8.66          | 37.28        |
| 4                              | 2 | 3 | 3 | 7.57           | 46.85        | 5                 | 4 | 5 | 4 | 8.66          | 37.28        |
| 4                              | 2 | 4 | 2 | 8.63           | 48.54        | 5                 | 4 | 6 | 3 | 20.74         | 52.51        |
| 4                              | 2 | 5 | 1 | 30.01          | 56.72        | 5                 | 5 | 4 | 6 | 15.89         | 48.29        |
| 4                              | 3 | 1 | 6 | 37.24          | 67.74        | 5                 | 5 | 5 | 5 | 20.38         | 39.21        |
| 4                              | 3 | 2 | 5 | 20.35          | 50.47        | 5                 | 5 | 6 | 4 | 15.89         | 48.29        |
| 4                              | 3 | 3 | 4 | 2.72           | 42.64        | 5                 | 6 | 5 | 6 | 27.61         | 50.23        |
| 4                              | 3 | 4 | 3 | 2.72           | 42.64        | 5                 | 6 | 6 | 5 | 27.61         | 50.23        |
| 4                              | 3 | 5 | 2 | 20.35          | 50.47        | 5                 | 7 | 6 | 6 | 34.84         | 61.24        |
| 4                              | 3 | 6 | 1 | 37.24          | 67.74        | 6                 | 0 | 1 | 5 | 18.91         | 48.63        |
| 4                              | 4 | 2 | 6 | 27.58          | 61.49        | 6                 | 0 | 2 | 4 | -2.46         | 40.44        |
| 4                              | 4 | 3 | 5 | 14.44          | 44.57        | 6                 | 0 | 3 | 3 | -3.53         | 38.76        |
| 4                              | 4 | 4 | 4 | <b>-2.13</b>   | <b>38.42</b> | 6                 | 0 | 4 | 2 | -2.46         | 40.44        |
| 4                              | 4 | 5 | 3 | 14.44          | 44.57        | 6                 | 0 | 5 | 1 | 18.91         | 48.63        |
| 4                              | 4 | 6 | 2 | 27.58          | 61.49        | 6                 | 1 | 1 | 6 | 26.14         | 59.64        |
| 4                              | 5 | 3 | 6 | 21.67          | 55.58        | 6                 | 1 | 2 | 5 | 9.26          | 42.38        |
| 4                              | 5 | 4 | 5 | 9.59           | 40.35        | 6                 | 1 | 3 | 4 | -8.38         | 34.54        |
| 4                              | 5 | 5 | 4 | 9.59           | 40.35        | 6                 | 1 | 4 | 3 | -8.38         | 34.54        |
| 4                              | 5 | 6 | 3 | 21.67          | 55.58        | 6                 | 1 | 5 | 2 | 9.26          | 42.38        |
| 4                              | 6 | 4 | 6 | 16.81          | 51.37        | 6                 | 1 | 6 | 1 | 26.14         | 59.64        |
| 4                              | 6 | 5 | 5 | 21.31          | 42.29        | 6                 | 2 | 2 | 6 | 16.48         | 53.39        |
| 4                              | 6 | 6 | 4 | 16.81          | 51.37        | 6                 | 2 | 3 | 5 | 3.34          | 36.47        |
| 4                              | 7 | 5 | 6 | 28.54          | 53.30        | 6                 | 2 | 4 | 4 | <b>-13.23</b> | <b>30.32</b> |
| 4                              | 7 | 6 | 5 | 28.54          | 53.30        | 6                 | 2 | 5 | 3 | 3.34          | 36.47        |
| 4                              | 8 | 6 | 6 | 35.76          | 64.32        | 6                 | 2 | 6 | 2 | 16.48         | 53.39        |
| 5                              | 0 | 1 | 4 | 17.36          | 51.72        | 6                 | 3 | 3 | 6 | 10.57         | 47.49        |
| 5                              | 0 | 2 | 3 | 12.56          | 49.68        | 6                 | 3 | 4 | 5 | -1.51         | 32.26        |

|   |   |   |   |       |       |   |   |   |   |       |       |
|---|---|---|---|-------|-------|---|---|---|---|-------|-------|
| 5 | 0 | 3 | 2 | 12.56 | 49.68 | 6 | 3 | 5 | 4 | -1.51 | 32.26 |
| 5 | 0 | 4 | 1 | 17.36 | 51.72 | 6 | 3 | 6 | 3 | 10.57 | 47.49 |
| 5 | 1 | 1 | 5 | 29.08 | 53.65 | 6 | 4 | 4 | 6 | 5.72  | 43.27 |
| 5 | 1 | 2 | 4 | 7.71  | 45.46 | 6 | 4 | 5 | 5 | 10.21 | 34.19 |
| 5 | 1 | 3 | 3 | 6.64  | 43.78 | 6 | 4 | 6 | 4 | 5.72  | 43.27 |
| 5 | 1 | 4 | 2 | 7.71  | 45.46 | 6 | 5 | 5 | 6 | 17.44 | 45.21 |
| 5 | 1 | 5 | 1 | 29.08 | 53.65 | 6 | 5 | 6 | 5 | 17.44 | 45.21 |
| 5 | 2 | 1 | 6 | 36.31 | 64.66 | 6 | 6 | 6 | 6 | 24.66 | 56.22 |

<sup>a</sup>R6:  $\text{Li}_2\text{S}_6(\text{sol})_m + n\text{sol} \rightarrow \text{S}_3^{2-} + \text{Li}^+(\text{sol})_p + \text{S}_3^{2-} + \text{Li}^+(\text{sol})_q$ .

<sup>b</sup>The lowest  $\Delta G_r$  are in bold for each NCS in reactants.

Table S14. Reaction free energies ( $\Delta G_r$ , in kcal/mol) of R7 when considering the solvation structures with all possible NCS.

| coefficient in R7 <sup>a</sup> |   |   | $\Delta G_r^b$ |     |
|--------------------------------|---|---|----------------|-----|
| m                              | n | p | DMSO           | DOL |
| 1                              | 0 | 1 | <b>10.31</b>   | N/A |
| 2                              | 0 | 2 | <b>4.89</b>    | N/A |
| 2                              | 1 | 3 | 6.20           | N/A |

<sup>a</sup>R7:  $\text{LiS}_6^-(\text{DMSO})_m + n\text{DMSO} \rightarrow \text{LiS}_3^+(\text{DMSO})_p + \text{S}_3^{2-}$ .

<sup>b</sup>The lowest  $\Delta G_r$  are in bold for each NCS in reactants.

Table S15. Reaction free energies ( $\Delta G_r$ , in kcal/mol) of R8 when considering the solvation structures with all possible NCS.

| coefficient in R8 <sup>a</sup> |   |   | $\Delta G_r^b$ |     |
|--------------------------------|---|---|----------------|-----|
| m                              | n | p | DMSO           | DOL |
| 1                              | 0 | 1 | <b>20.84</b>   | N/A |
| 2                              | 0 | 2 | 11.17          | N/A |
| 2                              | 1 | 3 | 5.26           | N/A |
| 2                              | 2 | 4 | <b>0.41</b>    | N/A |
| 2                              | 3 | 5 | 12.13          | N/A |
| 2                              | 4 | 6 | 19.36          | N/A |

<sup>a</sup>R8:  $\text{LiS}_6^-(\text{DMSO})_m + n\text{DMSO} \rightarrow \text{S}_3^{*-} + \text{Li}^+(\text{DMSO})_p + \text{S}_3^{*-}$ .

<sup>b</sup>The lowest  $\Delta G_r$  are in bold for each NCS in reactants.



Table S16. Imaginary frequencies (in  $\text{cm}^{-1}$ ) of all transition states.

| label            | imaginary frequency |
|------------------|---------------------|
| TS1 <sup>a</sup> | -102.80             |
| TS2 <sup>a</sup> | -63.55              |
| TS <sup>b</sup>  | -73.51              |
| TS1 <sup>c</sup> | -102.61             |
| TS2 <sup>c</sup> | -64.50              |

<sup>a</sup>The transition state refers to the one with the same label in Fig. 4 and S12.

<sup>b</sup>The transition state refers to the one with the same label in Fig. S13 and S16.

<sup>c</sup>The transition state refers to the one with the same label in Fig. S22.

## 5. Spin-crossing analysis from $^1S_6^{2-*}$ to $^3(S_3^{\cdot-}-S_3^{\cdot-})$ in DMSO

Singlet  $^1S_6^{2-*}$  transforms into a triplet complex  $^3(S_3^{\cdot-}-S_3^{\cdot-})$  through a spin-state crossing of PESs. Using the single-reference DFT methods (revM06 in this work) is hard to obtain the accurate barrier of this spin-state crossing process. We thus simply estimate the barrier of this process based on the single-state broken symmetry calculations with the spin-contamination correction along the interpolation path from  $^1S_6^{2-*}$  to  $^3(S_3^{\cdot-}-S_3^{\cdot-})$ . In particular, we firstly obtain a series of interpolation structures from  $^1S_6^{2-*}$  to  $^3(S_3^{\cdot-}-S_3^{\cdot-})$ . Then the triplet, singlet, and spin-mixed energies (Fig. S15a) of these interpolation structures are computed. The maximum energy point (denoted as TS2) of the spin-mixed curve exhibits the imaginary vibration toward  $^1S_6^{2-*}$  and  $^1(S_3^{\cdot-}-S_3^{\cdot-})$ . Because of the spin incompleteness, this point is not the pure singlet state. We convert this unphysical spin-mixed energy to pure singlet energy based on the spin-contamination correction.<sup>5,6</sup> After adding the free energy corrections, the spin-crossing process proceeds based on the free energy curve depicted in Fig. S15(b). The estimated barrier (1.99 kcal/mol) is expected to be slightly higher than the actual spin-state crossing barrier because the reaction path is unoptimized.

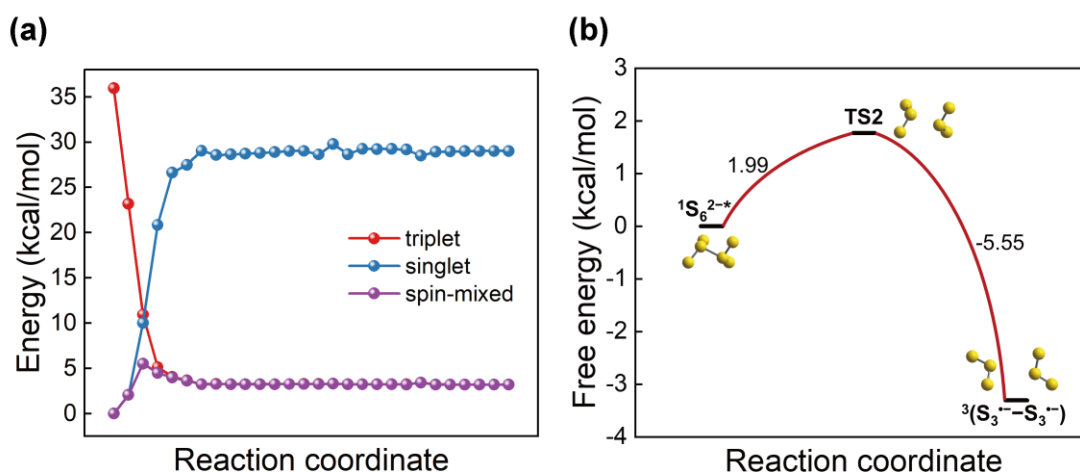

Fig. S15. (a) Potential energies of triplet, singlet, and spin mixed state of  $S_6^{2-*}$  with the gradual separation of two  $S_3^{\cdot-}$  moieties. (b) Free energy curve of the spin-crossing process. The inset images are optimized structures in DMSO.

## 6. Generation mechanism of trisulfur radicals in DOL

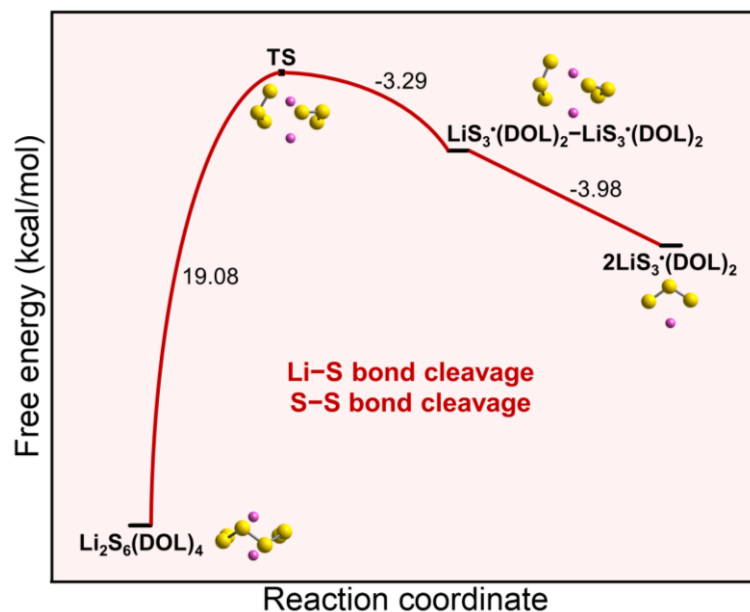

Fig. S16. Proposed generation mechanism of trisulfur radicals in DOL for the reaction of  $\text{Li}_2\text{S}_6(\text{DOL})_4 \rightarrow 2\text{LiS}_3^*(\text{DOL})_2$ . Along the free energy curve, the numbers represent the free energy change of each step. Inset images are optimized structures with explicit DOL molecules not shown for clarity (complete solvation structures are shown in Fig. S13). The whole process involves Li-S bond cleavage and S-S bond cleavage steps.

## 7. Generation of trisulfur radicals in DMA

To validate the generalizability of the findings in this work, we explore the generation of trisulfur radicals in DMA, another high  $\epsilon$ /DN solvent.

We first optimize the solvation structures (see Fig. S17–S21) of all relevant species ( $\text{Li}_2\text{S}_6$ ,  $\text{LiS}_6^-$ ,  $\text{S}_6^{2-}$ ,  $\text{LiS}_3^*$ ,  $\text{S}_3^{*-}$ , and  $\text{Li}^+$ ) in DMA. As shown in Table S17, for Li-containing species, the total binding free energies ( $G_b$ ) in DMSO and DMA are obviously more negative than those in DOL, while the relative magnitudes of  $G_b$  between DMSO and DMA are uncertain, indicating the binding strength between the solvents and sulfur species is largely affected by the DN of solvents but the DN is not the only influencing factor (the DNs of DMSO, DMA, and DOL are 29.8, 27.8 and 18.0 kcal/mol). The solvent structure (such as molecular size, shape) may also influence the binding strength. We also find that all species exhibit very similar solvation behavior in DMA as that in DMSO. Specifically, for Li-containing species,  $G_b$  first decreases and then increases with the increasing NCS until the saturation of solvent coordination. For  $\text{S}_6^{2-}$  and  $\text{S}_3^{*-}$ , their solvation is unfavorable due to the positive  $G_b$ . Besides, the results of the best NCS are the same among DMSO, DMA, and DOL, indicating the extremely robust Li-four-coordinated feature in the solvation of Li-containing species.

We further compute the reaction free energies ( $\Delta G_r$ ) of R1–R9 in DMA and the corresponding lowest  $\Delta G_r$  are shown in Tables S18 and S19. The negative  $\Delta G_r$  values of R1–R9 mean that  $\text{Li}_2\text{S}_6$  can spontaneously dissociate into  $\text{LiS}_6^-$  and  $\text{S}_6^{2-}$ , and the generation of trisulfur radicals is favorable in DMA. In addition, the dissociation of  $\text{Li}_2\text{S}_6$  into  $\text{LiS}_6^-$  and  $\text{S}_6^{2-}$  as well as the decomposition of hexasulfides to produce trisulfur radicals would be thermodynamically easier when hexasulfides are more fully solvated. These observations are similar to those we find in DMSO, demonstrating the generalizability of our findings.

Fig. S22 displays the detailed reaction mechanism for the reaction  $\text{S}_6^{2-} \rightarrow 2\text{S}_3^{*-}$ . The variation trend of free energies along the pathway is again very similar as that in DMSO (see Fig. 4 in the Manuscript). Moreover, the maximum free energy barrier in Fig. S22 is 9.63 kcal/mol, indicating the generation of trisulfur radicals is kinetically feasible in DMA.

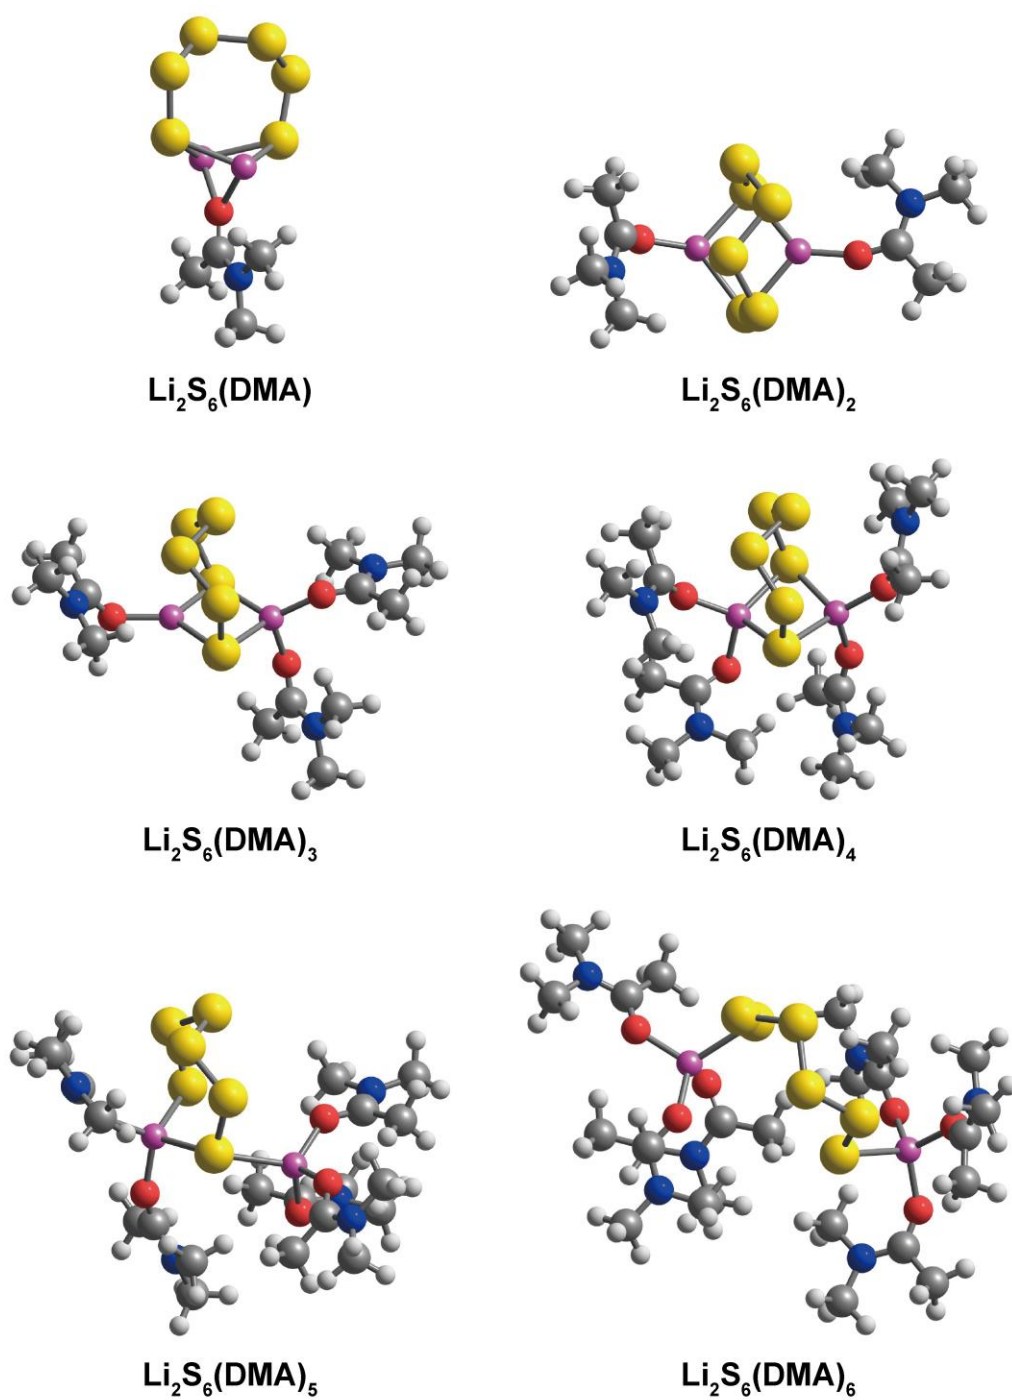

Fig. S17. Optimized solvation structures of  $\text{Li}_2\text{S}_6$  in DMA.

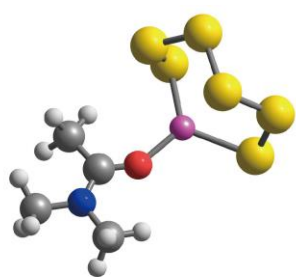

$\text{LiS}_6^-(\text{DMA})$

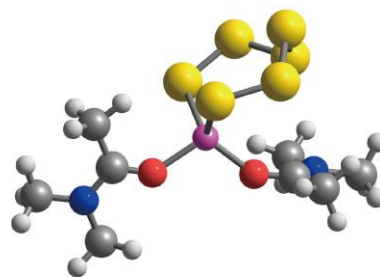

$\text{LiS}_6^-(\text{DMA})_2$

Fig. S18. Optimized solvation structures of  $\text{LiS}_6^-$  in DMA.

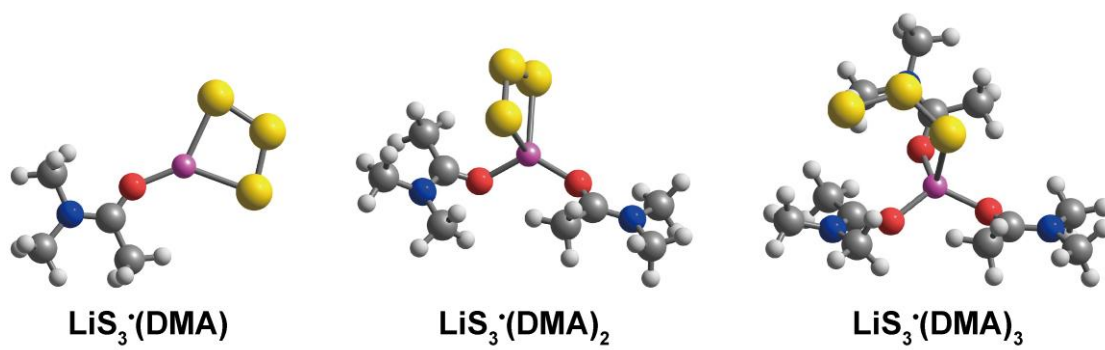

Fig. S19. Optimized solvation structures of  $\text{LiS}_3^+$  in DMA.

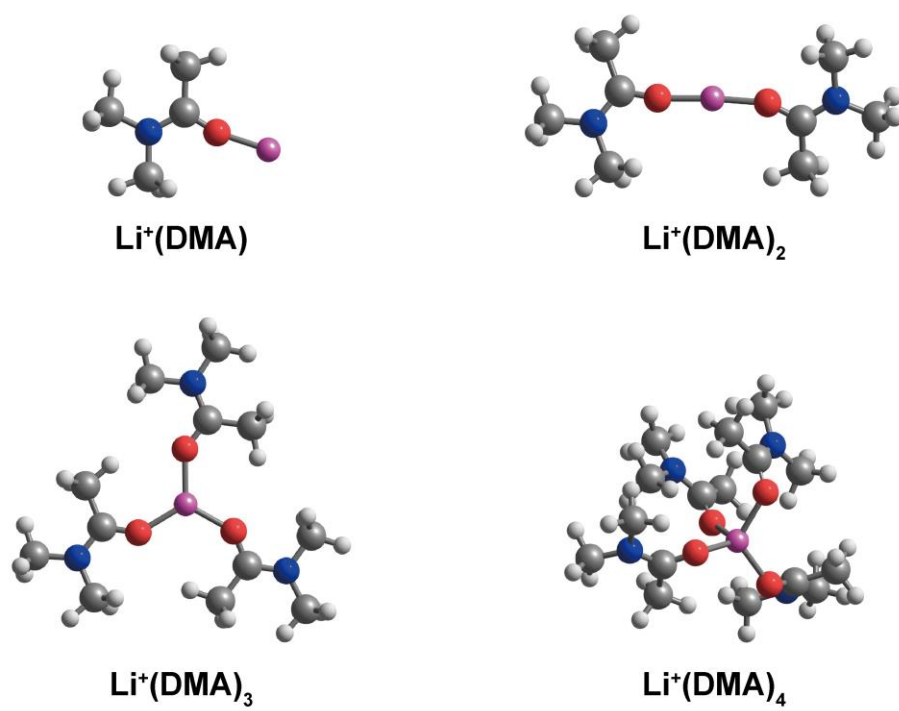

Fig. S20. Optimized solvation structures of  $\text{Li}^+$  in DMA.



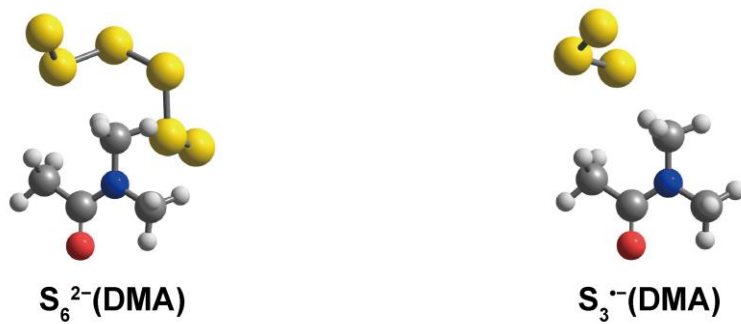

Fig. S21. Optimized solvation structures of  $S_6^{2-}$  and  $S_3^+$  in DMA.

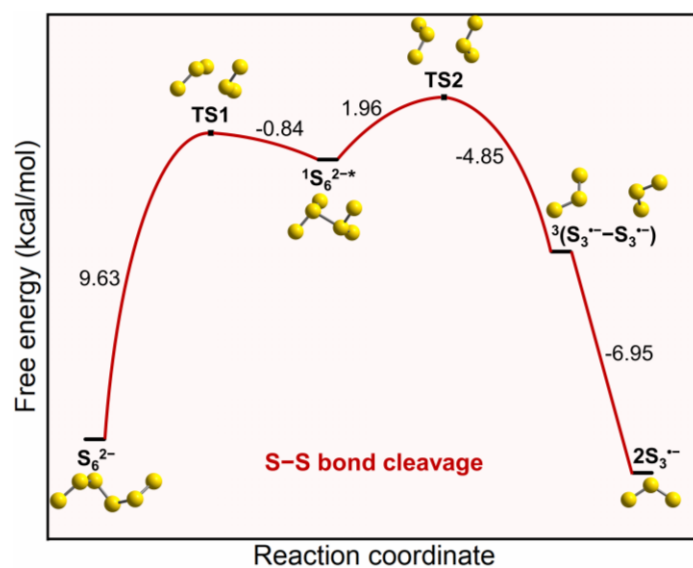

Fig. S22. Proposed generation mechanism of trisulfur radicals in DMA for the reaction of  $S_6^{2-} \rightarrow 2S_3^{\cdot-}$ . Along the free energy curve, the numbers represent the free energy change of each step. Inset images are optimized structures. The whole pathway is a process of S-S bond cleavage.

Table S17. Total binding free energies [ $G_b(n)$ , in kcal/mol] and successive binding free energies [ $\Delta G_b(n)$ , in kcal/mol] with different numbers of coordinated solvents (NCS,  $n$ ) in DMSO, DMA, and DOL solvents.

| solute                         | $n$ | $G_b(n)$ |        |        | $\Delta G_b(n)$ |        |        | best NCS |     |     |
|--------------------------------|-----|----------|--------|--------|-----------------|--------|--------|----------|-----|-----|
|                                |     | DMSO     | DMA    | DOL    | DMSO            | DMA    | DOL    | DMSO     | DMA | DOL |
| Li <sub>2</sub> S <sub>6</sub> | 1   | -5.80    | -6.27  | -1.76  | -5.80           | -6.27  | -1.76  |          |     |     |
|                                | 2   | -18.59   | -20.14 | -11.86 | -12.79          | -13.87 | -10.11 |          |     |     |
|                                | 3   | -20.91   | -20.17 | -10.70 | -2.32           | -0.03  | 1.16   | 4        | 4   | 4   |
|                                | 4   | -21.29   | -22.83 | -14.38 | -0.38           | -2.67  | -3.68  |          |     |     |
|                                | 5   | -20.37   | -17.96 | -11.31 | 0.93            | 4.87   | 3.07   |          |     |     |
|                                | 6   | -10.20   | -12.24 | -6.29  | 10.17           | 5.72   | 5.02   |          |     |     |
| LiS <sub>6</sub> <sup>-</sup>  | 1   | -6.03    | -6.22  | -2.10  | -6.03           | -6.22  | -2.10  | 2        | 2   | 2   |
|                                | 2   | -6.03    | -6.35  | -3.11  | 0.00            | -0.13  | -1.02  |          |     |     |
| S <sub>6</sub> <sup>2-</sup>   | 1   | 5.30     | 4.98   | 5.27   | 5.30            | 4.98   | 5.27   | N/A      | N/A | N/A |
| LiS <sub>3</sub> <sup>·</sup>  | 1   | -9.38    | -10.60 | -4.85  | -9.38           | -10.60 | -4.85  |          |     |     |
|                                | 2   | -14.79   | -14.28 | -9.64  | -5.42           | -3.68  | -4.79  | 2        | 2   | 2   |
|                                | 3   | -13.48   | -14.05 | -8.31  | 1.31            | 0.23   | 1.33   |          |     |     |
|                                | 4   | N/A      | N/A    | -4.77  | N/A             | N/A    | 3.54   |          |     |     |
| S <sub>3</sub> <sup>*-</sup>   | 1   | 5.15     | 5.13   | 4.28   | 5.15            | 5.13   | 4.28   | N/A      | N/A | N/A |
| Li <sup>+</sup>                | 1   | -14.54   | -16.82 | -10.02 | -14.54          | -16.82 | -10.02 |          |     |     |
|                                | 2   | -24.20   | -26.06 | -16.27 | -9.65           | -9.24  | -6.25  |          |     |     |
|                                | 3   | -30.11   | -31.56 | -22.17 | -5.92           | -5.50  | -5.90  | 4        | 4   | 4   |
|                                | 4   | -34.96   | -32.37 | -26.39 | -4.85           | -0.81  | -4.22  |          |     |     |
|                                | 5   | -23.24   | N/A    | -24.46 | 11.72           | N/A    | 1.93   |          |     |     |
|                                | 6   | -16.01   | N/A    | -13.44 | 7.23            | N/A    | 11.02  |          |     |     |

Table S18. Lowest reaction free energies ( $\Delta G_r$ , in kcal/mol) of R1–R3 for reactants with different numbers of coordinated solvents (NCS) in DMSO, DMA, and DOL solvents.

| label | reaction                                                                                                                 | $\Delta G_r$ |       |       |
|-------|--------------------------------------------------------------------------------------------------------------------------|--------------|-------|-------|
|       |                                                                                                                          | DMSO         | DMA   | DOL   |
| R1    | $\text{Li}_2\text{S}_6(\text{sol})_2 \rightarrow \text{LiS}_6^-(\text{sol}) + \text{Li}^+(\text{sol})$                   | 15.17        | 14.49 | 30.42 |
|       | $\text{Li}_2\text{S}_6(\text{sol})_3 \rightarrow \text{LiS}_6^-(\text{sol}) + \text{Li}^+(\text{sol})_2$                 | 7.84         | 5.28  | 23.00 |
|       | $\text{Li}_2\text{S}_6(\text{sol})_4 + 2\text{sol} \rightarrow \text{LiS}_6^-(\text{sol})_2 + \text{Li}^+(\text{sol})_4$ | -2.54        | 1.51  | 15.55 |
|       | $\text{Li}_2\text{S}_6(\text{sol})_5 + \text{sol} \rightarrow \text{LiS}_6^-(\text{sol})_2 + \text{Li}^+(\text{sol})_4$  | -3.47        | -3.36 | 12.48 |
|       | $\text{Li}_2\text{S}_6(\text{sol})_6 \rightarrow \text{LiS}_6^-(\text{sol})_2 + \text{Li}^+(\text{sol})_4$               | -13.64       | -9.09 | 7.46  |
| R2    | $\text{Li}_2\text{S}_6(\text{sol})_2 \rightarrow \text{S}_6^{2-} + 2\text{Li}^+(\text{sol})$                             | 36.49        | 34.55 | 76.29 |
|       | $\text{Li}_2\text{S}_6(\text{sol})_3 \rightarrow \text{S}_6^{2-} + \text{Li}^+(\text{sol}) + \text{Li}^+(\text{sol})_2$  | 29.16        | 25.34 | 68.87 |
|       | $\text{Li}_2\text{S}_6(\text{sol})_4 + 4\text{sol} \rightarrow \text{S}_6^{2-} + 2\text{Li}^+(\text{sol})_4$             | -1.64        | 6.15  | 46.07 |
|       | $\text{Li}_2\text{S}_6(\text{sol})_5 + 3\text{sol} \rightarrow \text{S}_6^{2-} + 2\text{Li}^+(\text{sol})_4$             | -2.57        | 1.28  | 43.00 |
|       | $\text{Li}_2\text{S}_6(\text{sol})_6 + 2\text{sol} \rightarrow \text{S}_6^{2-} + 2\text{Li}^+(\text{sol})_4$             | -12.74       | -4.45 | 37.97 |
| R3    | $\text{LiS}_6^-(\text{sol}) \rightarrow \text{S}_6^{2-} + \text{Li}^+(\text{sol})$                                       | 21.33        | 20.06 | 45.87 |
|       | $\text{LiS}_6^-(\text{sol})_2 + 2\text{sol} \rightarrow \text{S}_6^{2-} + \text{Li}^+(\text{sol})_4$                     | 0.90         | 4.64  | 30.52 |

Table S19. Lowest reaction free energies ( $\Delta G_r$ , in kcal/mol) of R4–R9 for reactants with different numbers of coordinated solvents (NCS) in DMSO, DMA, and DOL solvents.

| label | reaction                                                                                                                                                 | $\Delta G_r$ |       |       |
|-------|----------------------------------------------------------------------------------------------------------------------------------------------------------|--------------|-------|-------|
|       |                                                                                                                                                          | DMSO         | DMA   | DOL   |
| R4    | $\text{Li}_2\text{S}_6(\text{sol})_2 \rightarrow 2\text{LiS}_3^{\bullet}(\text{sol})$                                                                    | 14.95        | 12.39 | 18.85 |
|       | $\text{Li}_2\text{S}_6(\text{sol})_3 \rightarrow \text{LiS}_3^{\bullet}(\text{sol}) + \text{LiS}_3^{\bullet}(\text{sol})_2$                              | 11.86        | 8.73  | 12.90 |
|       | $\text{Li}_2\text{S}_6(\text{sol})_4 \rightarrow 2\text{LiS}_3^{\bullet}(\text{sol})_2$                                                                  | 6.82         | 7.71  | 11.80 |
|       | $\text{Li}_2\text{S}_6(\text{sol})_5 \rightarrow 2\text{LiS}_3^{\bullet}(\text{sol})_2 + \text{sol}$                                                     | 5.90         | 2.84  | 8.73  |
|       | $\text{Li}_2\text{S}_6(\text{sol})_6 \rightarrow 2\text{LiS}_3^{\bullet}(\text{sol})_2 + 2\text{sol}$                                                    | -4.27        | -2.88 | 3.70  |
| R5    | $\text{Li}_2\text{S}_6(\text{sol})_2 \rightarrow \text{S}_3^{\bullet-} + \text{Li}^+(\text{sol}) + \text{LiS}_3^{\bullet}(\text{sol})$                   | 25.48        | 22.94 | 43.75 |
|       | $\text{Li}_2\text{S}_6(\text{sol})_3 \rightarrow \text{S}_3^{\bullet-} + \text{Li}^+(\text{sol})_2 + \text{LiS}_3^{\bullet}(\text{sol})$                 | 18.15        | 13.74 | 36.33 |
|       | $\text{Li}_2\text{S}_6(\text{sol})_4 + 2\text{sol} \rightarrow \text{S}_3^{\bullet-} + \text{Li}^+(\text{sol})_4 + \text{LiS}_3^{\bullet}(\text{sol})_2$ | 2.35         | 6.4   | 25.11 |
|       | $\text{Li}_2\text{S}_6(\text{sol})_5 + \text{sol} \rightarrow \text{S}_3^{\bullet-} + \text{Li}^+(\text{sol})_4 + \text{LiS}_3^{\bullet}(\text{sol})_2$  | 1.42         | 1.53  | 22.04 |
|       | $\text{Li}_2\text{S}_6(\text{sol})_6 \rightarrow \text{S}_3^{\bullet-} + \text{Li}^+(\text{sol})_4 + \text{LiS}_3^{\bullet}(\text{sol})_2$               | -8.75        | -4.19 | 17.01 |
| R6    | $\text{Li}_2\text{S}_6(\text{sol})_2 \rightarrow 2\text{S}_3^{\bullet-} + 2\text{Li}^+(\text{sol})$                                                      | 36.00        | 33.5  | 68.64 |
|       | $\text{Li}_2\text{S}_6(\text{sol})_3 \rightarrow 2\text{S}_3^{\bullet-} + \text{Li}^+(\text{sol}) + \text{Li}^+(\text{sol})_2$                           | 28.67        | 24.29 | 61.22 |
|       | $\text{Li}_2\text{S}_6(\text{sol})_4 + 4\text{sol} \rightarrow 2\text{S}_3^{\bullet-} + 2\text{Li}^+(\text{sol})_4$                                      | -2.13        | 5.09  | 38.42 |
|       | $\text{Li}_2\text{S}_6(\text{sol})_5 + 3\text{sol} \rightarrow 2\text{S}_3^{\bullet-} + 2\text{Li}^+(\text{sol})_4$                                      | -3.06        | 0.22  | 35.35 |
|       | $\text{Li}_2\text{S}_6(\text{sol})_6 + 2\text{sol} \rightarrow 2\text{S}_3^{\bullet-} + 2\text{Li}^+(\text{sol})_4$                                      | -13.23       | -5.5  | 30.32 |
| R7    | $\text{LiS}_6^-(\text{sol}) \rightarrow \text{LiS}_3^{\bullet}(\text{sol}) + \text{S}_3^{\bullet-}$                                                      | 10.31        | 8.45  | N/A   |
|       | $\text{LiS}_6^-(\text{sol})_2 \rightarrow \text{LiS}_3^{\bullet}(\text{sol})_2 + \text{S}_3^{\bullet-}$                                                  | 4.89         | 4.90  | N/A   |
| R8    | $\text{LiS}_6^-(\text{sol}) \rightarrow 2\text{S}_3^{\bullet-} + \text{Li}^+(\text{sol})$                                                                | 20.84        | 19.00 | N/A   |
|       | $\text{LiS}_6^-(\text{sol})_2 + 2\text{sol} \rightarrow 2\text{S}_3^{\bullet-} + \text{Li}^+(\text{sol})_4$                                              | 0.41         | 3.59  | N/A   |
| R9    | $\text{S}_6^{2-} \rightarrow 2\text{S}_3^{\bullet-}$                                                                                                     | -0.49        | -1.05 | N/A   |

## 8. Generation of tetrasulfur and disulfur radicals in DMSO and DOL

In addition to trisulfur radicals, we also explore the generation of tetrasulfur ( $\text{LiS}_4^\bullet$ ,  $\text{S}_4^{\bullet-}$ ) and disulfur ( $\text{LiS}_2^\bullet$ ,  $\text{S}_2^{\bullet-}$ ) radicals from hexasulfides. The relevant reactions are as follows (because we already denoted some reactions in the Manuscript as R1–R9, here we label the following reactions as R10–R17):

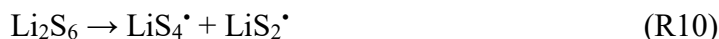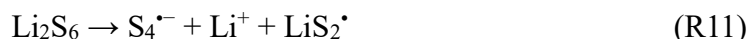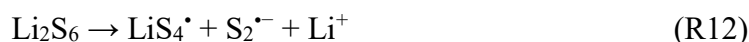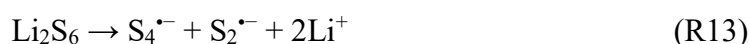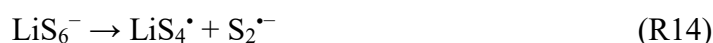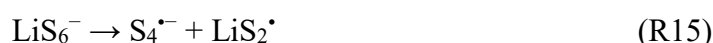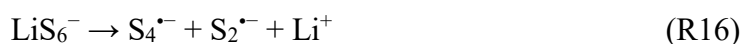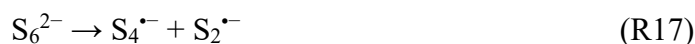

The optimized solvation structures of  $\text{LiS}_4^\bullet$ ,  $\text{S}_4^{\bullet-}$ ,  $\text{LiS}_2^\bullet$ , and  $\text{S}_2^{\bullet-}$  with different numbers of coordinated solvents (NCS) are shown in Fig. S23–S28. As shown in Table S20, for  $\text{LiS}_4^\bullet$  and  $\text{LiS}_2^\bullet$ , with the increase of NCS, the total binding free energies ( $G_b$ ) first decreases and then increases until the saturation of solvent coordination. The best NCS of  $\text{LiS}_4^\bullet$  and  $\text{LiS}_2^\bullet$  are two in DMSO and DOL, again indicating that four-coordinated solvation structures of Li are the most stable. As for  $\text{S}_4^{\bullet-}$  and  $\text{S}_2^{\bullet-}$ , the  $G_b$  are positive, indicating that their solvation is energetically unfavorable. These results show that tetrasulfur and disulfur radicals have very similar solvation behavior as trisulfur radicals in DMSO and DOL.

Next, we calculate the reaction free energies ( $\Delta G_r$ ) of R10–R17 based on all possible solvation states of involved species. The corresponding lowest  $\Delta G_r$  are listed in Table S21. The  $\Delta G_r$  from hexasulfides to tetrasulfur and disulfur radicals are higher than 4.05 and 16.58 kcal/mol in DMSO and DOL, respectively, demonstrating that the generation of tetrasulfur and disulfur radicals is slightly unfavorable in DMSO and rather unfavorable in DOL. Combining with the results about the trisulfur radical generation (see Table 3 in Manuscript), we conclude that hexasulfides prefer to decompose into trisulfur rather than tetrasulfur and disulfur radicals in DMSO and DOL. This finding may explain why tetrasulfur and disulfur radicals are commonly undetected in Li–S batteries.

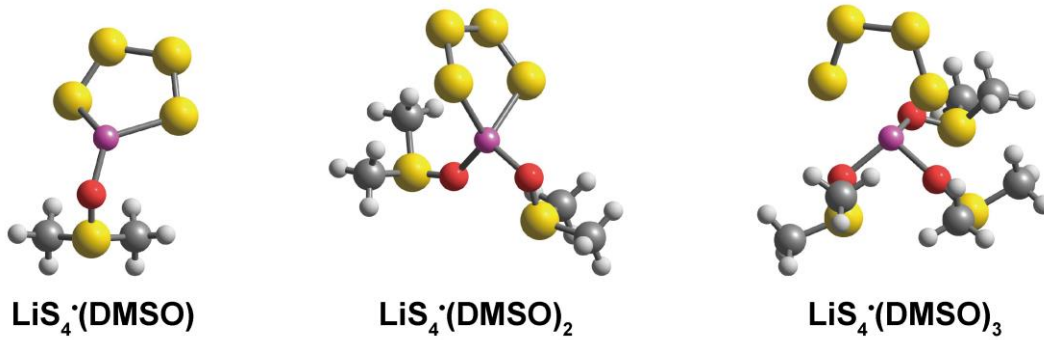

Fig. S23. Optimized solvation structures of  $\text{LiS}_4^+$  in DMSO.

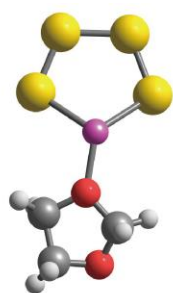

$\text{LiS}_4^+(\text{DOL})$

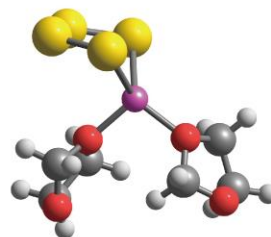

$\text{LiS}_4^+(\text{DOL})_2$

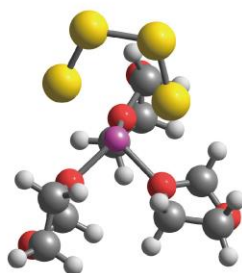

$\text{LiS}_4^+(\text{DOL})_3$

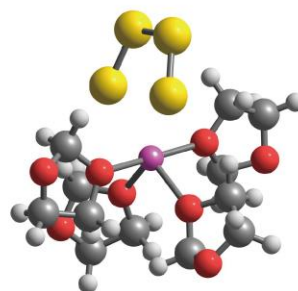

$\text{LiS}_4^+(\text{DOL})_4$

Fig. S24. Optimized solvation structures of  $\text{LiS}_4^+$  in DOL.



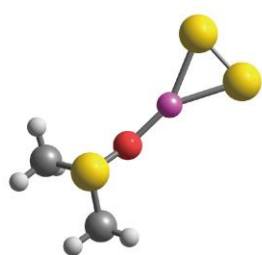

$\text{LiS}_2 \cdot (\text{DMSO})$

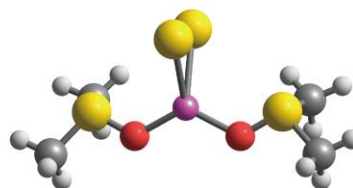

$\text{LiS}_2 \cdot (\text{DMSO})_2$

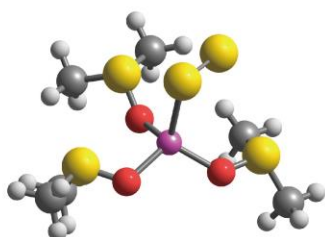

$\text{LiS}_2 \cdot (\text{DMSO})_3$

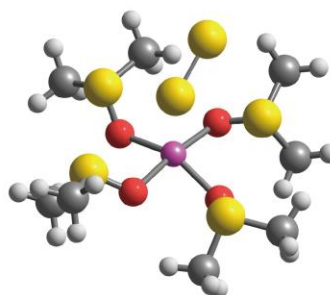

$\text{LiS}_2 \cdot (\text{DMSO})_4$

Fig. S25. Optimized solvation structures of  $\text{LiS}_2^*$  in DMSO.

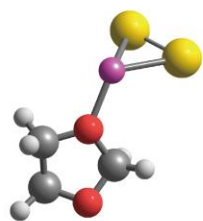

$\text{LiS}_2 \cdot (\text{DOL})$

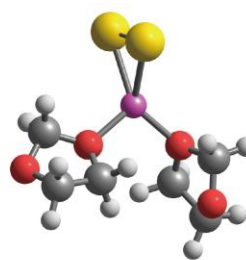

$\text{LiS}_2 \cdot (\text{DOL})_2$

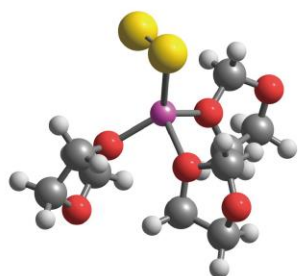

$\text{LiS}_2 \cdot (\text{DOL})_3$

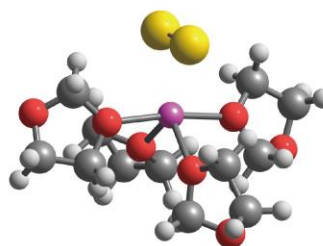

$\text{LiS}_2 \cdot (\text{DOL})_4$

Fig. S26. Optimized solvation structures of  $\text{LiS}_2 \cdot$  in DOL.

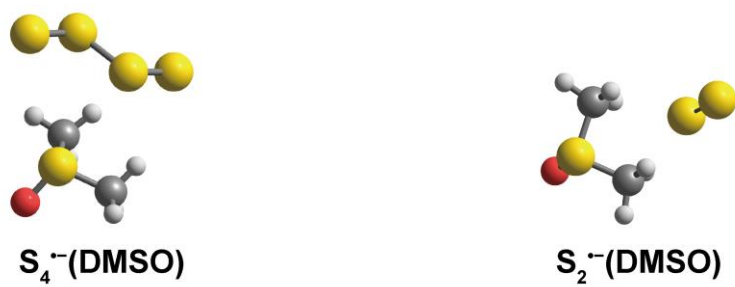

Fig. S27. Optimized solvation structures of  $S_4^-$  and  $S_2^-$  in DMSO.

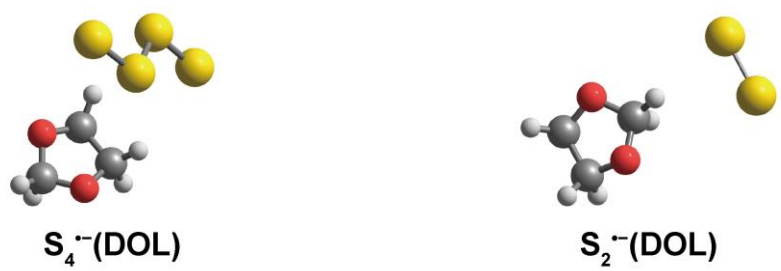

Fig. S28. Optimized solvation structures of  $S_4^-$  and  $S_2^-$  in DOL.

Table S20. Total binding free energies [ $G_b(n)$ , in kcal/mol] and successive binding free energies [ $\Delta G_b(n)$ , in kcal/mol] with different numbers of coordinated solvents (NCS,  $n$ ) in DMSO and DOL solvents.

| solute                        | $n$ | $G_b(n)$ |        | $\Delta G_b(n)$ |       | best NCS |     |
|-------------------------------|-----|----------|--------|-----------------|-------|----------|-----|
|                               |     | DMSO     | DOL    | DMSO            | DOL   | DMSO     | DOL |
| LiS <sub>4</sub> <sup>•</sup> | 1   | -9.75    | -5.21  | -9.75           | -5.21 |          |     |
|                               | 2   | -15.23   | -9.74  | -5.48           | -4.53 | 2        | 2   |
|                               | 3   | -11.79   | -8.45  | 3.44            | 1.30  |          |     |
|                               | 4   | N/A      | -3.69  | N/A             | 4.75  |          |     |
| S <sub>4</sub> <sup>•-</sup>  | 1   | 5.94     | 6.29   | 5.94            | 6.29  | N/A      | N/A |
| LiS <sub>2</sub> <sup>•</sup> | 1   | -10.77   | -5.34  | -10.77          | -5.34 |          |     |
|                               | 2   | -14.24   | -10.02 | -3.47           | -4.68 | 2        | 2   |
|                               | 3   | -12.35   | -7.55  | 1.89            | 2.47  |          |     |
|                               | 4   | -6.24    | -4.18  | 6.11            | 3.37  |          |     |
| S <sub>2</sub> <sup>•-</sup>  | 1   | 4.22     | 4.95   | 4.22            | 4.95  | N/A      | N/A |

Table S21. Lowest reaction free energies ( $\Delta G_r$ , in kcal/mol) of R10–R17 for reactants with different numbers of coordinated solvents (NCS) in DMSO and DOL solvents.

| label | reaction                                                                                                                                              | $\Delta G_r$ |       |
|-------|-------------------------------------------------------------------------------------------------------------------------------------------------------|--------------|-------|
|       |                                                                                                                                                       | DMSO         | DOL   |
| R10   | $\text{Li}_2\text{S}_6(\text{sol})_2 \rightarrow \text{LiS}_4^*(\text{sol}) + \text{LiS}_2^*(\text{sol})$                                             | 25.61        | 31.36 |
|       | $\text{Li}_2\text{S}_6(\text{sol})_3 \rightarrow \text{LiS}_4^*(\text{sol})_2 + \text{LiS}_2^*(\text{sol})$                                           | 22.46        | 25.67 |
|       | $\text{Li}_2\text{S}_6(\text{sol})_4 \rightarrow \text{LiS}_4^*(\text{sol})_2 + \text{LiS}_2^*(\text{sol})_2$                                         | 19.37        | 24.68 |
|       | $\text{Li}_2\text{S}_6(\text{sol})_5 \rightarrow \text{LiS}_4^*(\text{sol})_2 + \text{LiS}_2^*(\text{sol})_2 + \text{sol}$                            | 18.45        | 21.61 |
|       | $\text{Li}_2\text{S}_6(\text{sol})_6 \rightarrow \text{LiS}_4^*(\text{sol})_2 + \text{LiS}_2^*(\text{sol})_2 + 2\text{sol}$                           | 8.27         | 16.58 |
| R11   | $\text{Li}_2\text{S}_6(\text{sol})_2 \rightarrow \text{S}_4^{\bullet-} + \text{Li}^+(\text{sol}) + \text{LiS}_2^*(\text{sol})$                        | 37.46        | 56.78 |
|       | $\text{Li}_2\text{S}_6(\text{sol})_3 \rightarrow \text{S}_4^{\bullet-} + \text{Li}^+(\text{sol})_2 + \text{LiS}_2^*(\text{sol})$                      | 30.13        | 49.36 |
|       | $\text{Li}_2\text{S}_6(\text{sol})_4 + 2\text{sol} \rightarrow \text{S}_4^{\bullet-} + \text{Li}^+(\text{sol})_4 + \text{LiS}_2^*(\text{sol})_2$      | 16.28        | 38.25 |
|       | $\text{Li}_2\text{S}_6(\text{sol})_5 + \text{sol} \rightarrow \text{S}_4^{\bullet-} + \text{Li}^+(\text{sol})_4 + \text{LiS}_2^*(\text{sol})_2$       | 15.36        | 35.18 |
|       | $\text{Li}_2\text{S}_6(\text{sol})_6 \rightarrow \text{S}_4^{\bullet-} + \text{Li}^+(\text{sol})_4 + \text{LiS}_2^*(\text{sol})_2$                    | 5.18         | 30.16 |
| R12   | $\text{Li}_2\text{S}_6(\text{sol})_2 \rightarrow \text{LiS}_4^*(\text{sol}) + \text{Li}^+(\text{sol}) + \text{S}_2^{\bullet-}$                        | 41.43        | 60.48 |
|       | $\text{Li}_2\text{S}_6(\text{sol})_3 \rightarrow \text{LiS}_4^*(\text{sol}) + \text{Li}^+(\text{sol})_2 + \text{S}_2^{\bullet-}$                      | 34.1         | 53.06 |
|       | $\text{Li}_2\text{S}_6(\text{sol})_4 + 2\text{sol} \rightarrow \text{LiS}_4^*(\text{sol})_2 + \text{Li}^+(\text{sol})_4 + \text{S}_2^{\bullet-}$      | 18.23        | 42.1  |
|       | $\text{Li}_2\text{S}_6(\text{sol})_5 + \text{sol} \rightarrow \text{LiS}_4^*(\text{sol})_2 + \text{Li}^+(\text{sol})_4 + \text{S}_2^{\bullet-}$       | 17.31        | 39.03 |
|       | $\text{Li}_2\text{S}_6(\text{sol})_6 \rightarrow \text{LiS}_4^*(\text{sol})_2 + \text{Li}^+(\text{sol})_4 + \text{S}_2^{\bullet-}$                    | 7.14         | 34.01 |
| R13   | $\text{Li}_2\text{S}_6(\text{sol})_2 \rightarrow \text{S}_4^{\bullet-} + \text{S}_2^{\bullet-} + 2\text{Li}^+(\text{sol})$                            | 53.28        | 85.89 |
|       | $\text{Li}_2\text{S}_6(\text{sol})_3 \rightarrow \text{S}_4^{\bullet-} + \text{S}_2^{\bullet-} + \text{Li}^+(\text{sol}) + \text{Li}^+(\text{sol})_2$ | 45.95        | 78.48 |
|       | $\text{Li}_2\text{S}_6(\text{sol})_4 + 4\text{sol} \rightarrow \text{S}_4^{\bullet-} + \text{S}_2^{\bullet-} + 2\text{Li}^+(\text{sol})_4$            | 15.14        | 55.68 |
|       | $\text{Li}_2\text{S}_6(\text{sol})_5 + 3\text{sol} \rightarrow \text{S}_4^{\bullet-} + \text{S}_2^{\bullet-} + 2\text{Li}^+(\text{sol})_4$            | 14.22        | 52.6  |
|       | $\text{Li}_2\text{S}_6(\text{sol})_6 + 2\text{sol} \rightarrow \text{S}_4^{\bullet-} + \text{S}_2^{\bullet-} + 2\text{Li}^+(\text{sol})_4$            | 4.05         | 47.58 |
| R14   | $\text{LiS}_6^-(\text{sol}) \rightarrow \text{LiS}_4^*(\text{sol}) + \text{S}_2^{\bullet-}$                                                           | 26.26        | N/A   |
|       | $\text{LiS}_6^-(\text{sol})_2 \rightarrow \text{LiS}_4^*(\text{sol})_2 + \text{S}_2^{\bullet-}$                                                       | 20.78        | N/A   |
| R15   | $\text{LiS}_6^-(\text{sol}) \rightarrow \text{S}_4^{\bullet-} + \text{LiS}_2^*(\text{sol})$                                                           | 22.30        | N/A   |
|       | $\text{LiS}_6^-(\text{sol})_2 \rightarrow \text{S}_4^{\bullet-} + \text{LiS}_2^*(\text{sol})_2$                                                       | 18.82        | N/A   |
| R16   | $\text{LiS}_6^-(\text{sol}) \rightarrow \text{S}_4^{\bullet-} + \text{S}_2^{\bullet-} + \text{Li}^+(\text{sol})$                                      | 38.11        | N/A   |
|       | $\text{LiS}_6^-(\text{sol})_2 + 2\text{sol} \rightarrow \text{S}_4^{\bullet-} + \text{S}_2^{\bullet-} + \text{Li}^+(\text{sol})_4$                    | 17.69        | N/A   |
| R17   | $\text{S}_6^{2-} \rightarrow \text{S}_4^{\bullet-} + \text{S}_2^{\bullet-}$                                                                           | 16.79        | N/A   |

## References

1. Y. Wang, P. Verma, X. Jin, D. G. Truhlar, and X. He, *Proc. Natl. Acad. Sci. U.S.A.*, 2018, **115**, 10257–10262.
2. B. Jeziorski, R. Moszynski, and K. Szalewicz, *Chem. Rev.*, 1994, **94**, 1887–1930.
3. D. G. A. Smith, L. A. Burns, A. C. Simmonett, R. M. Parrish, M. C. Schieber, R. Galvelis, P. Kraus, H. Kruse, R. Di Remigio, A. Alenaizan, A. M. James, S. Lehtola, J. P. Misiewicz, M. Scheurer, R. A. Shaw, J. B. Schriber, Y. Xie, Z. L. Glick, D. A. Sirianni, J. S. O'Brien, J. M. Waldrop, A. Kumar, E. G. Hohenstein, B. P. Pritchard, B. R. Brooks, H. F. Schaefer, A. Y. Sokolov, K. Patkowski, A. E. DePrince, 3rd, U. Bozkaya, R. A. King, F. A. Evangelista, J. M. Turney, T. D. Crawford, and C. D. Sherrill, *J. Chem. Phys.*, 2020, **152**, 184108.
4. A. V. Marenich, S. V. Jerome, C. J. Cramer, and D. G. Truhlar, *J. Chem. Theory Comput.*, 2012, **8**, 527–541.
5. M. Shoji, K. Koizumi, Y. Kitagawa, T. Kawakami, S. Yamanaka, M. Okumura, and K. Yamaguchi, *Chem. Phys. Lett.*, 2006, **432**, 343–347.
6. X. Xu, S. Gozem, M. Olivucci, and D. G. Truhlar, *J. Phys. Chem. Lett.*, 2013, **4**, 253–258.
